# Supplementary material for: Ni and Pd N-confused porphyrin complexes as catalysts for the synthesis of cyclic carbonates from epoxides and CO2
Source: Royal Society of Chemistry journal article supplement (doi:10.1039/c9dt00104b), 2019-01-01

## Supplementary Information

### Ni and Pd N-confused porphyrin complexes as catalysts for the synthesis of cyclic carbonates from epoxides and CO<sub>2</sub>

Jay-ar B. dela Cruz<sup>a,b,c</sup>, Mirko Ruamps<sup>c</sup>, Susan Arco<sup>d</sup>, and Chen-Hsiung Hung<sup>c</sup>

<sup>a</sup>*Sustainable Chemical Science and Technology, Taiwan International Graduate Program, Taiwan ROC*

<sup>b</sup>*Department of Applied Chemistry, National Chiao Tung University, Hsinchu, Taiwan 300 ROC*

<sup>c</sup>*Institute of Chemistry, Academia Sinica, 128 Sec 2 Academia Rd., Nankang, Taipei 11529, Taiwan ROC*

<sup>d</sup>*Institute of Chemistry, University of the Philippines -Diliman, Quezon City 1101 Philippines*

|                                                                                                                                                                                                                               |     |
|-------------------------------------------------------------------------------------------------------------------------------------------------------------------------------------------------------------------------------|-----|
| [1] Synthesis of Ni <sup>II</sup> NCTPP, catalysts <b>1</b> and <b>2</b> , and their precursors                                                                                                                               | S2  |
| [2] Coupling Reaction of CO <sub>2</sub> with Epoxide                                                                                                                                                                         | S4  |
| [3] Sample % conversion calculation from <sup>1</sup> H NMR data                                                                                                                                                              | S5  |
| [4] <sup>1</sup> H NMR and <sup>13</sup> C NMR spectra                                                                                                                                                                        | S7  |
| [5] High Resolution mass spectra                                                                                                                                                                                              | S17 |
| [6] Elemental Analysis Report                                                                                                                                                                                                 | S20 |
| [7] Theoretical calculations coordinates and relative energies                                                                                                                                                                | S21 |
| [8] General information for crystal structure of 2-NH <sub>2</sub> - <i>m</i> -C <sub>6</sub> H <sub>4</sub> -CO <sub>2</sub> CH <sub>3</sub> NCTPP (i14918; CCDC1889366)                                                     | S29 |
| Table S1. Crystal data and structure refinement for i14918                                                                                                                                                                    | S30 |
| Figure S1. Molecular structure of 2-NH <sub>2</sub> - <i>m</i> -C <sub>6</sub> H <sub>4</sub> -CO <sub>2</sub> CH <sub>3</sub> NCTPP from X-ray single structure determination with atoms presented in 30% thermal ellipsoids | S31 |

## [1] Synthesis of Ni<sup>II</sup>NCTPP, catalysts 1 and 2, and their precursors.

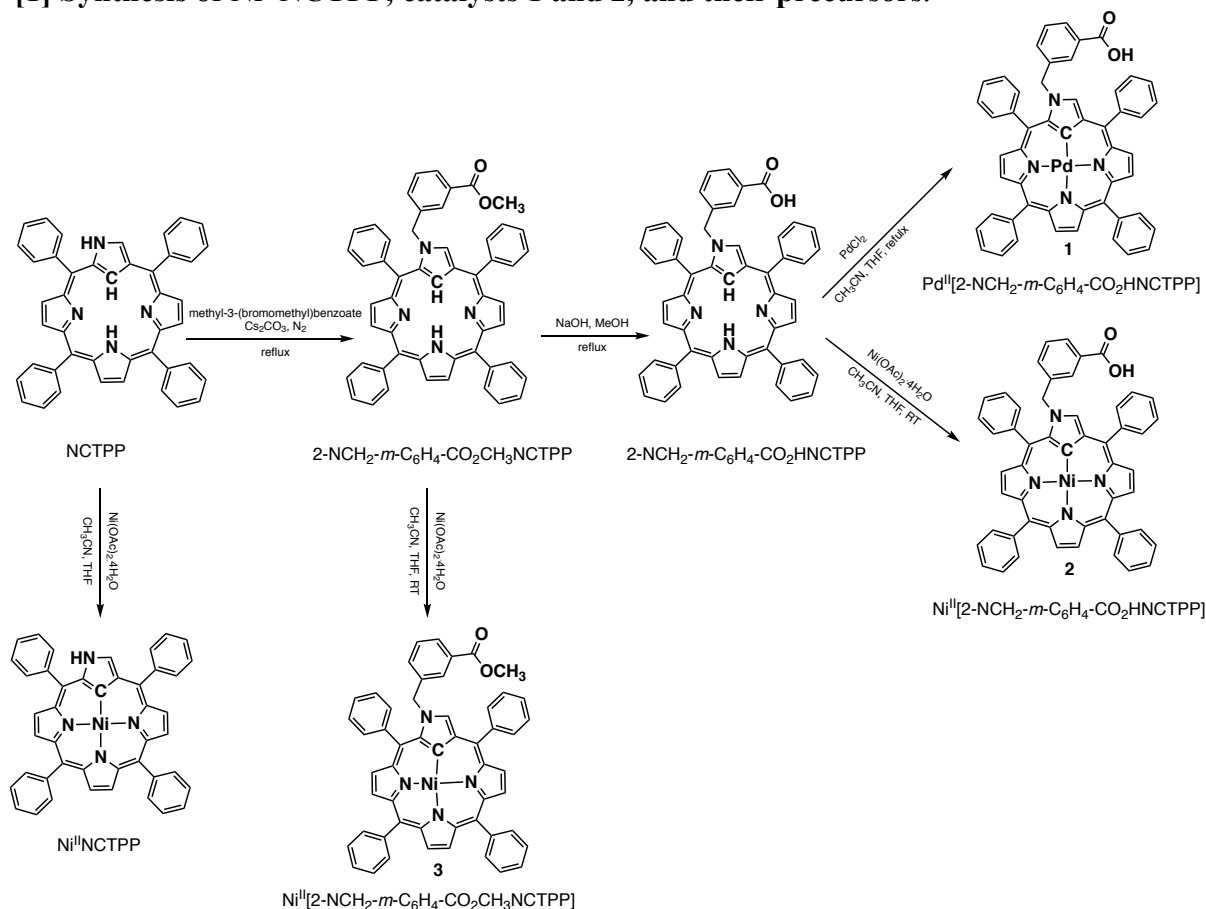

### 2-NCH<sub>2</sub>-*m*-C<sub>6</sub>H<sub>4</sub>CO<sub>2</sub>CH<sub>3</sub>NCTPP.

A mixture of NCTPP (100.0 mg 0.163 mmol), Cs<sub>2</sub>CO<sub>3</sub> (156.4 mg, 0.488 mmol), and methyl-3-(bromomethyl)benzoate (146.6 mg, 0.651 mmol) was heated at 100 °C in 20.0 mL dry dimethylformamide under nitrogen for two hours. After cooling down to room temperature, dimethylformamide was removed under vacuum and re-dissolved in CH<sub>2</sub>Cl<sub>2</sub> to filter off excess Cs<sub>2</sub>CO<sub>3</sub>. The mixture was purified by silica gel column chromatography with acetone-CH<sub>2</sub>Cl<sub>2</sub> [4:96 (v/v)] to obtain a green solid product (84.0 mg, 68%). <sup>1</sup>H NMR (400 MHz, CDCl<sub>3</sub>): δ 1.71 (s, 1H), 3.82 (s, 3H), 4.07 (br s, 1H), 4.99 (s, 2H), 6.41 (d, J = 7.7 Hz, 1H), 6.92 (t, J = 7.7 Hz, 1H), 7.29 (s, 1H), 7.35 (d, J = 4.8 Hz, 1H), 7.40 (s, 1H), 7.43–7.47 (m, 3H), 7.53–7.58 (m, 10H), 7.63–7.71 (m, 6H), 7.78–7.82 (m, 4H), 7.88 (d, J = 4.5 Hz, 1H), 7.90–7.93 (m, 2H); <sup>13</sup>C NMR (100 MHz, CDCl<sub>3</sub>): δ 52.1, 53.6, 107.3, 115.4, 115.8, 124.4, 126.8, 127.2, 127.5, 127.8, 128.2, 128.4, 128.6, 128.7, 129.2, 129.5, 130.0, 130.2, 130.6, 130.8, 131.2, 133.2, 133.4, 133.5, 134.9, 135.9, 136.1, 137.5, 140.0, 141.1, 141.5, 143.6, 143.9, 154.0, 155.0, 163.6, 163.9, 166.6; UV/Vis (CH<sub>2</sub>Cl<sub>2</sub>): λ<sub>max</sub> (ε) 362 (25260), 446 (64062), 658 (6808), 716 (8738); HRMS(ESI) Calc for C<sub>53</sub>H<sub>39</sub>N<sub>4</sub>O<sub>2</sub> ([M+H]<sup>+</sup>) 763.3073, found 763.3082.

### 2-NCH<sub>2</sub>-*m*-C<sub>6</sub>H<sub>4</sub>CO<sub>2</sub>HNCTPP.

A mixture of 2-NCH<sub>2</sub>-*m*-C<sub>6</sub>H<sub>4</sub>CO<sub>2</sub>CH<sub>3</sub>NCTPP (100.0 mg, 0.131 mmol) and 1.0 M NaOH (3.9 mL, 3.9 mmol) was refluxed at 80 °C in a mixture of dry THF:CH<sub>3</sub>OH (12:8) mL under nitrogen for two hours. The reaction mixture was then dried, to which 1.0 M HCl (3.9 mL, 3.9 mmol) was added. The solid product was filtered off and washed several times with RO water. The crude product was purified by silica gel column chromatography with CH<sub>3</sub>OH-CH<sub>2</sub>Cl<sub>2</sub> [3:97 (v/v)] to obtain a dark green solid product (88.3 mg, 90%). <sup>1</sup>H NMR (400 MHz, CDCl<sub>3</sub>):

$\delta$  5.02 (s, 2H), 6.12 (s, 1H), 6.41 (d,  $J = 7.6$  Hz, 1H), 6.87 (t,  $J = 7.6$  Hz, 1H), 7.19 (s, 1H), 7.5 (d,  $J = 7.6$  Hz, 1H), 7.57–7.65 (m, 10H), 7.70–7.87 (m, 14 H), 8.06 (d,  $J = 6.5$  Hz, 2H), 8.21 (d,  $J = 4.8$  Hz, 1H);  $^{13}\text{C}$  NMR (100 MHz,  $\text{CDCl}_3$ ):  $\delta$  54.3, 117.3, 118.4, 124.8, 125.6, 127.4, 127.6, 127.8, 128.1, 128.3, 129.2, 129.2, 129.5, 129.9, 130.8, 132.6, 132.8, 132.9, 133.4, 134.1, 134.3, 134.4, 134.6, 135.0, 135.2, 135.4, 136.7, 138.5, 139.6, 140.7, 169.0; UV/Vis ( $\text{CH}_2\text{Cl}_2$ ):  $\lambda_{\text{max}}$  ( $\epsilon$ ) 307 (19592), 368 (24054), 461 (81738), 566 (3121), 720 (5374), 793 (12019); HRMS(ESI) Calc for  $\text{C}_{52}\text{H}_{37}\text{N}_4\text{O}_2$  ( $[\text{M}+\text{H}]^+$ ) 749.2917, found 749.2908.

#### **$\text{Pd}^{\text{II}}$ [2-NCH<sub>2</sub>-*m*-C<sub>6</sub>H<sub>4</sub>CO<sub>2</sub>HNCTPP] (1).**

Palladium(II) chloride (94.7 mg, 0.536 mmol) was dissolved in 10 mL dry  $\text{CH}_3\text{CN}$  and added to 2-NCH<sub>2</sub>-*m*-C<sub>6</sub>H<sub>4</sub>CO<sub>2</sub>HNCTPP (100 mg, 0.134 mmol) that was previously dissolved in 20 mL dry THF. The mixture was refluxed to 80 °C for three hours. The crude product was dried under vacuum and purified by silica gel column chromatography with  $\text{CH}_3\text{OH}-\text{CH}_2\text{Cl}_2$  [5:95 (v/v)] to obtain a brownish solid product (64.9 mg, 57%).  $^1\text{H}$  NMR (400 MHz,  $\text{CDCl}_3$ ):  $\delta$  5.14 (s, 2H), 6.82 (d,  $J = 7.8$  Hz, 1H), 7.07 (t,  $J = 7.8$  Hz, 1H), 7.27–7.31 (m, 2H), 7.43–7.59 (m, 14 H), 7.71 (d,  $J = 5.0$  Hz, 1H), 7.78–7.90 (m, 10H), 8.02 (d,  $J = 5.0$  Hz, 1H), 8.29 (s, 1H);  $^{13}\text{C}$  NMR (100 MHz,  $\text{CDCl}_3$ ):  $\delta$  54.9, 118.6, 119.5, 122.9, 126.6, 126.9, 127.0, 127.1, 127.2, 127.5, 127.7, 128.3, 128.8, 129.2, 129.4, 129.9, 130.6, 130.8, 131.3, 131.7, 131.8, 133.1, 133.3, 133.7, 138.1, 138.9, 140.1, 141.8, 142.3, 143.7, 146.8, 148.7, 148.8, 151.4, 152.4, 170.3; UV/Vis ( $\text{CH}_2\text{Cl}_2$ ):  $\lambda_{\text{max}}$  ( $\epsilon$ ) 376 (6923), 393 (7100), 429 (10926), 450 (15635), 533 (1327), 576 (850), 700 (987), 764 (1127); HRMS(ESI<sub>neg</sub>) Calc for  $\text{C}_{52}\text{H}_{33}\text{N}_4\text{O}_2\text{Pd}$  ( $[\text{M}-\text{H}]^-$ ) 851.1638, found 851.1644; Elemental analysis calc (%) for  $\text{C}_{52}\text{H}_{34}\text{N}_4\text{PdO}_2$  (MW = 853.27) + 1.85  $\text{H}_2\text{O}$  + 0.3  $\text{CH}_2\text{Cl}_2$  : C 68.87, H 4.23, N 6.14, found: C 68.47, H 4.46, N 6.57 ( $\text{CH}_2\text{Cl}_2$  and water could not be removed from compound **1** totally despite drying it under high vacuum).

#### **$\text{Ni}^{\text{II}}$ [2-NCH<sub>2</sub>-*m*-C<sub>6</sub>H<sub>4</sub>CO<sub>2</sub>HNCTPP] (2).**

Nickel(II) acetate tetrahydrate (132.9 mg, 0.536 mmol) was dissolved in 15 mL dry  $\text{CH}_3\text{CN}$  and added to 2-NCH<sub>2</sub>-*m*-C<sub>6</sub>H<sub>4</sub>CO<sub>2</sub>HNCTPP (100 mg, 0.134 mmol) that was previously dissolved in 20 mL dry THF. The mixture was refluxed to 80 °C for three hours. The crude product was dried under vacuum and purified by silica gel column chromatography with  $\text{CH}_3\text{OH}-\text{CH}_2\text{Cl}_2$  [3:97 (v/v)] to obtain a greenish solid product (49.5 mg, 46%).  $^1\text{H}$  NMR (400 MHz,  $\text{CDCl}_3$ ):  $\delta$  5.12 (s, 2H), 6.81 (d,  $J = 7.7$  Hz, 1H), 7.09 (t,  $J = 7.7$  Hz, 1H), 7.29–7.32 (m, 2H), 7.42–7.56 (m, 13H), 7.62–7.67 (m, 2H), 7.76–7.88 (m, 10H), 8.02 (d,  $J = 5.0$  Hz, 1H), 8.36 (s, 1H);  $^{13}\text{C}$  NMR (100 MHz,  $\text{CDCl}_3$ ):  $\delta$  54.8, 117.1, 118.2, 121.9, 123.8, 125.9, 126.8, 127.0, 127.1, 127.1, 127.2, 127.6, 127.7, 128.2, 128.3, 128.8, 129.2, 129.5, 130.2, 130.7, 130.9, 131.6, 132.3, 132.9, 133.1, 133.3, 133.5, 138.0, 138.7, 139.8, 141.3, 144.6, 146.3, 148.3, 149.7, 151.4, 151.6, 153.8, 170.6; UV/Vis ( $\text{CH}_2\text{Cl}_2$ ):  $\lambda_{\text{max}}$  ( $\epsilon$ ) 363 (23524), 429 (43297), 462 (24873), 560 (5270), 722 (2496), 792 (2634); HRMS(ESI<sub>neg</sub>) Calc for  $\text{C}_{52}\text{H}_{33}\text{N}_4\text{O}_2\text{Ni}$  ( $[\text{M}-\text{H}]^-$ ) 803.1957, found 803.1967; Elemental analysis calc (%) for  $\text{C}_{52}\text{H}_{34}\text{N}_4\text{NiO}_2$  (MW = 805.58) + 0.85  $\text{C}_7\text{H}_8$  + 1.05  $\text{H}_2\text{O}$  : C 77.1, H 4.79, N 6.21, found: C 77.01, H 4.68, N 6.12 (toluene was used to freeze dry compound **2** but could not be removed totally despite drying it under high vacuum).

#### **$\text{Ni}^{\text{II}}$ [2-NCH<sub>2</sub>-*m*-C<sub>6</sub>H<sub>4</sub>CO<sub>2</sub>CH<sub>3</sub>NCTPP] (3).**

Nickel(II) acetate tetrahydrate (130.5 mg, 0.524 mmol) was dissolved in 15 mL dry  $\text{CH}_3\text{CN}$  and added to 2-NCH<sub>2</sub>-*m*-C<sub>6</sub>H<sub>4</sub>CO<sub>2</sub>CH<sub>3</sub>NCTPP (100 mg, 0.131 mmol) that was previously dissolved in 20 mL dry THF. The mixture was refluxed to 80 °C for three hours. The crude product was dried under vacuum and purified by silica gel column chromatography with  $\text{CH}_3\text{OH}-\text{CH}_2\text{Cl}_2$  [1:99 (v/v)] to obtain a greenish solid product (58.0 mg, 54%).  $^1\text{H}$  NMR (400

MHz, CD<sub>2</sub>Cl<sub>2</sub>):  $\delta$  3.82 (s, 3 H), 5.16 (s, 2H), 6.83 (d,  $J$  = 7.5 Hz, 1H), 7.14 (t,  $J$  = 7.5 Hz, 1H), 7.34–7.41 (m, 3H), 7.48 (d,  $J$  = 7.4 Hz, 2H), 7.53 (d, 7.5 Hz, 1H), 7.56–7.62 (m, 9H), 7.69–7.72 (m, 2H), 7.81–7.85 (m, 6H), 7.88–7.90 (m, 2H), 7.92–7.95 (m, 2H), 8.10 (d,  $J$  = 5.0 Hz, 1H), 8.45 (s, 1H); <sup>13</sup>C NMR (100 MHz, CDCl<sub>3</sub>):  $\delta$  52.4, 55.5, 117.6, 118.8, 122.3, 124.7, 126.3, 127.3, 127.5, 127.6, 127.6, 127.7, 127.8, 128.0, 128.4, 128.7, 129.0, 129.1, 130.4, 130.5, 130.8, 131.7, 132.1, 132.6, 132.6, 133.2, 133.5, 133.8, 133.9, 134.1, 138.2, 139.0, 140.1, 141.7, 144.9, 146.7, 148.6, 150.0, 151.7, 152.8, 153.9, 166.8; UV/Vis (CH<sub>2</sub>Cl<sub>2</sub>):  $\lambda_{\max}$  ( $\epsilon$ ) 363 (22677), 428 (40444), 462 (23687), 559 (4949), 721 (2230), 792 (2336); HRMS(ESI) Calc for C<sub>53</sub>H<sub>37</sub>N<sub>4</sub>O<sub>2</sub>Ni ([M]<sup>+</sup>) 819.2270, found 819.2277; Elemental analysis calc (%) for C<sub>53</sub>H<sub>36</sub>N<sub>4</sub>O<sub>2</sub>Ni (MW = 819.6) + 1.05 C<sub>7</sub>H<sub>8</sub> + 1.95 H<sub>2</sub>O + 0.3 CH<sub>2</sub>Cl<sub>2</sub>: C 74.56, H 5.05, N 5.73, found: C 73.99, H 4.46, N 5.73 (Toluene was used to freeze dry compound **3** but solvents could not be removed totally despite drying it under high vacuum).

### Ni<sup>II</sup>NCTPP.

Ni<sup>II</sup>NCTPP was first reported by Latos-Grażyński and co-workers<sup>1</sup> in 1994. For our study, nickel(II) acetate tetrahydrate (120.5 mg, 0.486 mmol) was dissolved in 15 mL dry CH<sub>3</sub>CN and added to N-confused tetraphenyl porphyrin (100 mg, 0.162 mmol) that was previously dissolved in 15 mL dry THF. The mixture was refluxed to 80 °C for six hours. The crude product was dried under vacuum and purified by silica gel column chromatography with hexane-CH<sub>2</sub>Cl<sub>2</sub> [4:6 (v/v)] to obtain crystalline green product with decent yield. <sup>1</sup>H NMR (400 MHz, CD<sub>2</sub>Cl<sub>2</sub>):  $\delta$  7.60–7.62 (m, 9H), 7.67–7.69 (m, 3H), 7.78–7.85 (m, 6H), 7.88–7.92 (m, 6H), 8.06 (d,  $J$  = 5.0 Hz, 1H), 8.09 (d,  $J$  = 5.0 Hz, 1H), 8.57 (d,  $J$  = 3.3 Hz, 1H), 10.23 (br s, 1H); <sup>13</sup>C NMR (100 MHz, CD<sub>2</sub>Cl<sub>2</sub>):  $\delta$  116.0, 117.3, 118.4, 124.1, 127.0, 127.1, 127.2, 127.4, 127.7, 128.0, 128.5, 129.0, 130.1, 131.5, 132.0, 132.3, 132.7, 133.0, 133.2, 133.4, 133.6, 137.7, 139.8, 141.6, 144.5, 144.8, 145.1, 148.5, 149.9, 151.8, 153.8; UV/Vis (CH<sub>2</sub>Cl<sub>2</sub>):  $\lambda_{\max}$  ( $\epsilon$ ) 301 (15208), 360 (32414), 425 (69635), 460 (33000), 518 (6201), 556 (6280), 594 (6977), 717 (3828), 788 (4175); HRMS(ESI) Calc for C<sub>44</sub>H<sub>28</sub>N<sub>4</sub>Ni ([M]<sup>+</sup>) 670.1667, found 670.1675.

### [2] Coupling Reaction of CO<sub>2</sub> with Epoxide.

**Procedure for a sample reaction.** A 30-mL stainless autoclave was charged with epoxide (with 7.0- to 10.0- mmol range), catalyst (mole percent with respect to epoxide indicated in the text), triethylamine or 2,6-lutidine (mole percent with respect to epoxide indicated in the text), and then CO<sub>2</sub> (initial pressure indicated in the text). The reaction was heated with stirring at constant temperature for a reaction time. The reactor was then cooled to room temperature followed by the slow release of excess CO<sub>2</sub>. Percent yield was determined by <sup>1</sup>H-NMR using dimethyl sulfone as an internal standard. To demonstrate obtaining isolated yield, column chromatography was done for **IB** with CH<sub>3</sub>OH-CH<sub>2</sub>Cl<sub>2</sub> [5:95 (v/v)].

**4-Phenoxymethyl-1,3-dioxolan-2-one (IB).** 89.6% <sup>1</sup>H NMR yield; 84.3 % isolated yield; <sup>1</sup>H NMR (CDCl<sub>3</sub>, 400 MHz)  $\delta$  4.11 (dd,  $J$  = 4.0, 11.0 Hz, 1H), 4.21 (dd,  $J$  = 4.0, 11.0 Hz, 1H), 4.50 (t,  $J$  = 8.0 Hz, 1H), 4.58 (t,  $J$  = 8.0 Hz, 1H), 4.97–5.02 (m, 1H), 6.87 (d,  $J$  = 7.5 Hz, 2H), 6.97 (t,  $J$  = 7.5 Hz, 1H), 7.26 (t,  $J$  = 7.5 Hz, 2H); <sup>13</sup>C NMR (CDCl<sub>3</sub>, 100 MHz)  $\delta$  66.1, 66.8, 74.1, 114.5, 121.8, 129.6, 129.5, 154.7, 157.7; HRMS (EI) calcd for C<sub>10</sub>H<sub>10</sub>O<sub>4</sub> 194.0579, found 194.0578 ([M]<sup>+</sup>)

**4-(chloromethyl)-1,3-dioxolan-2-one (IIB).** 98.0% <sup>1</sup>H NMR (CDCl<sub>3</sub>, 400 MHz)  $\delta$  3.63–3.79 (m, 2H), 4.29 (dd,  $J$  = 6, 8.5 Hz, 1H), 4.51 (t,  $J$  = 8.5 Hz, 1H), 4.93–4.98 (m, 1H); <sup>13</sup>C NMR (CDCl<sub>3</sub>, 100 MHz)  $\delta$  43.6, 66.9, 74.2, 154.1 ; HRMS (EI) calcd for C<sub>4</sub>H<sub>3</sub><sup>35</sup>ClO<sub>3</sub> 135.9927, found 135.9929 ([M]<sup>+</sup>)

**4-(butoxymethyl)-1,3-dioxolan-2-one (IIIB).** 92.0%  $^1\text{H}$  NMR ( $\text{CDCl}_3$ , 100 MHz)  $\delta$  0.88 (t, 7.5 Hz, 3H), 1.28–1.37 (m, 2H), 1.48–1.55 (m, 2H), 3.47 (t,  $J = 6.8$  Hz, 2H), 3.54–3.65 (m, 2H), 4.35 (dd,  $J = 6.0, 8.3$  Hz, 1H), 4.46 (t,  $J = 8.3$  Hz, 1H), 4.74–4.80 (m, 1H);  $^{13}\text{C}$  NMR ( $\text{CDCl}_3$ , 100 MHz)  $\delta$  13.7, 19.1, 31.4, 66.2, 69.6, 71.8, 75.1, 154.9; HRMS (FAB) calcd for  $\text{C}_8\text{H}_{15}\text{O}_4$  175.0970, found 175.0969 ( $[\text{M}+\text{H}]^+$ )

**4,4'-((ethane-1,2-diylbis(oxy))bis(methylene))bis(1,3-dioxolan-2-one) (IVB).** 89.5%  $^1\text{H}$  NMR ( $\text{CDCl}_3$ , 400 MHz)  $\delta$  3.59–3.76 (m, 8H), 4.34–4.43 (m, 2H), 4.45–4.50 (m, 2H), 4.76–4.83 (m, 2H);  $^{13}\text{C}$  NMR ( $\text{CDCl}_3$ , 100 MHz)  $\delta$  66.1, 70.3, 71.3, 75.2, 155.1; HRMS (APCI) calcd for  $\text{C}_{10}\text{H}_{15}\text{O}_8$  263.0767, found 263.0759 ( $[\text{M}+\text{H}]^+$ )

**4-methyl-1,3-dioxolan-2-one (VB).** 24.8%  $^1\text{H}$  NMR ( $\text{CDCl}_3$ , 400 MHz)  $\delta$  1.14 (d,  $J = 6.2$  Hz, 3H), 3.74 (t,  $J = 7.1$  Hz, 1H), 4.28 (dd,  $J = 7.1, 8.5$  Hz, 1H), 4.55–4.63 (m, 1H);  $^{13}\text{C}$  NMR ( $\text{CDCl}_3$ , 100 MHz)  $\delta$  18.9, 70.4, 73.4, 154.9; MS (EI) calcd for  $\text{C}_4\text{H}_6\text{O}_3$  102.0317, found 102.0316 ( $[\text{M}]^+$ )

### [3] Sample % conversion calculation from $^1\text{H}$ NMR data.

Total crude catalytic product is weighed, from which a portion (typically 20 – 30 mg) is taken for  $^1\text{H}$  NMR analysis. A known amount of dimethyl sulfone is added to the  $^1\text{H}$  NMR sample as internal standard. The number of moles of catalytic product in the  $^1\text{H}$  NMR sample is directly related to the ratio of the integration of the known catalytic product peak per number of proton in proportion to the standard's integration per proton:

$$\frac{n_{(p,NMR)}}{\left(\frac{I}{H}\right)_p} = \frac{n_{(s,NMR)}}{\left(\frac{I}{H}\right)_s}$$

where  $n_{(p,NMR)}$  = number of moles of the product contained in the NMR tube

$n_{(s,NMR)}$  = number of moles of the standard contained in the NMR tube

$(I/H)_p$  = integration per number of protons on a selected product  $^1\text{H}$  NMR peak

$(I/H)_s$  = integration per number of protons of the internal standard  $^1\text{H}$  NMR peak

The total number of moles of product in the crude reaction mixture is calculated by multiplying  $n_{(p,NMR)}$  by the ratio of the mass of the crude product to the mass of the crude NMR sample:

$$n_p = n_{(p,NMR)} \left( \frac{m_{crude}}{m_{NMR}} \right)$$

where  $n_p$  = total number of moles of the catalytic product

$m_{crude}$  = mass of the total crude product

$m_{NMR}$  = mass of the NMR sample

Percent yield, is taken as the ratio of  $n_p$  to the theoretical yield (in moles) multiplied by 100.

Sample (actual) data for the conversion of 1,2-epoxy-3-phenoxypropane, **IA** (molar mass: 150.17, density: 1.109 g/mL, purity: 99.0%) to 4-(phenoxyethyl)-1,3-dioxolan-2-one, **IB** (molar mass: 194.1) using dimethyl sulfone (molar mass: 94.13, purity: 98.0%) as standard:

|                                         |                          |
|-----------------------------------------|--------------------------|
| initial volume of substrate <b>IA</b> : | 4.08 mL                  |
| mass, crude product <b>IB</b> :         | 5867.3 mg                |
| mass, NMR sample:                       | 23.23 mg                 |
| mass, standard:                         | 19.8 mg                  |
| Integration for the standard:           | 11.6 ( $\delta$ 2.93, s) |
| Corresponding # of standard protons:    | 6                        |
| Integration for the product:            | 1 ( $\delta$ 5.00, m)    |
| Corresponding # of standard protons:    | 1                        |

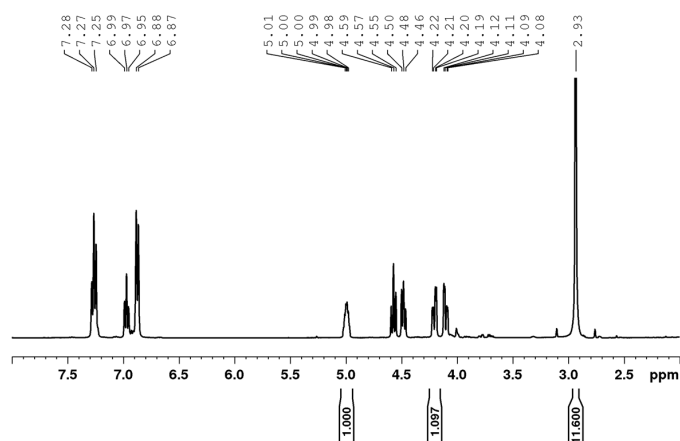

$$\frac{n_{(p,NMR)}}{\left(\frac{I}{H}\right)_p} = \frac{n_{(s,NMR)}}{\left(\frac{I}{H}\right)_s} \Rightarrow \frac{n_{(p,NMR)}}{1} = \frac{0.206 \text{ mmol}}{\frac{11.6}{6}}$$

$$n_{(p,NMR)} = 0.107 \text{ mmol}$$

$$n_p = n_{(p,NMR)} \times \left(\frac{m_{crude}}{m_{NMR}}\right) = 0.107 \text{ mmol} \times \left(\frac{5867.3 \text{ mg}}{23.23 \text{ mg}}\right) = 26.9 \text{ mmol}$$

$$\text{Theoretical yield} = 4.08 \text{ mL} \times \left(1109 \frac{\text{mg}}{\text{mL}}\right) \times 0.99 \times \left(\frac{\text{mmol IA}}{150.17 \text{ mg}}\right) \times \left(\frac{1 \text{ mmol IB}}{1 \text{ mmol IA}}\right) = 29.8 \text{ mmol}$$

$$\% \text{ yield} = \frac{26.9 \text{ mmol}}{29.8 \text{ mmol}} = \mathbf{90.4^1}$$

To account for the unreacted substrate, it is noteworthy to mention that the chemical shift at *ca.* 4.20 ppm corresponds to overlapping peaks of both the substrate and the product (with an assignment of 1 proton each) as shown in the overlay of **IA** and crude **IB** <sup>1</sup>H NMR spectra below:

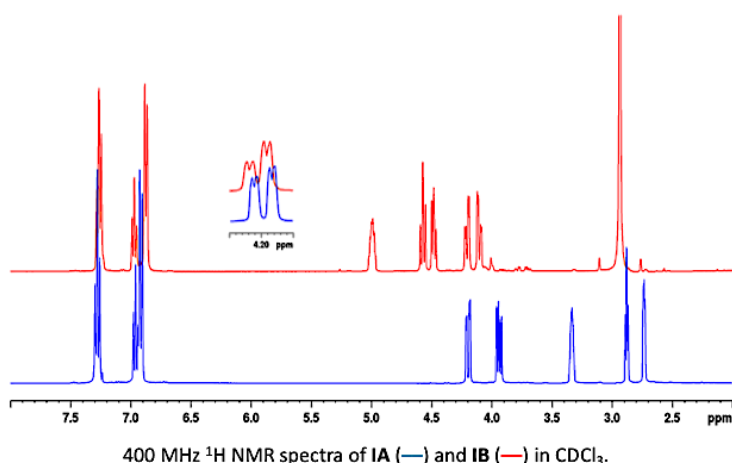

At the said chemical shift, the crude product's integration (red curve, upper panel) is 1.097, suggestive of residual unreacted substrate with an integration of 0.097. Using the same calculation, this equates to 2.61 mmol of unreacted **IA**, which, together with 26.93 mmol product yield, accounts for >99% of the initial number of moles of **IA** that initially went into the reaction.

<sup>1</sup> Rounding off was done in the final step of the calculation.

[4]  $^1\text{H}$  NMR and  $^{13}\text{C}$  NMR spectra.

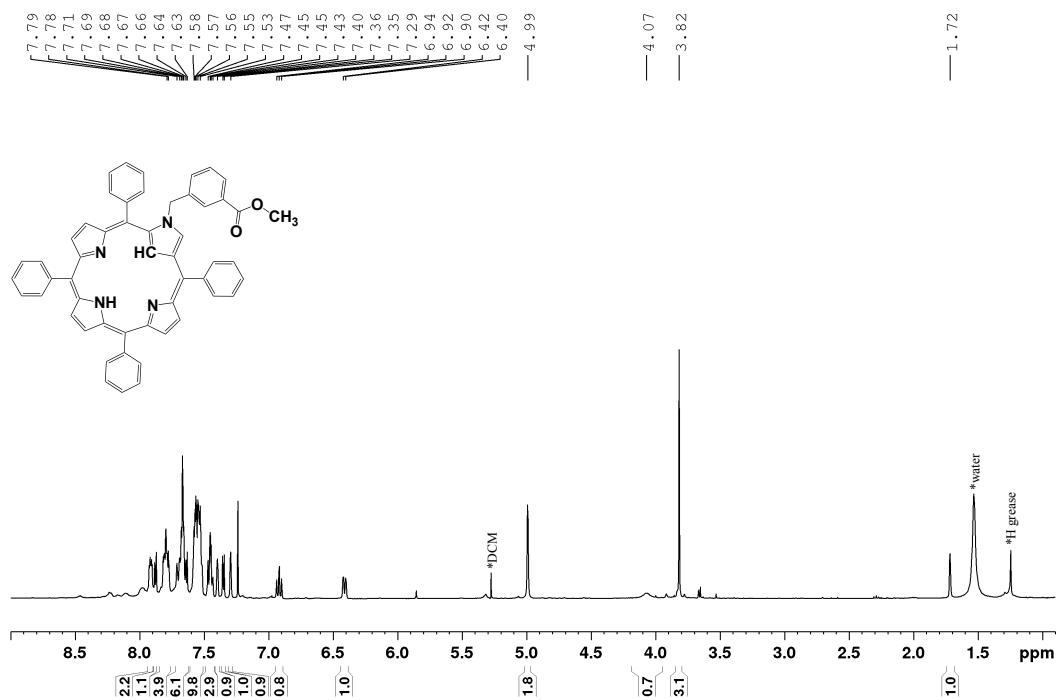

400 MHz  $^1\text{H}$  NMR spectrum of 2-NCH<sub>2</sub>-m-C<sub>6</sub>H<sub>4</sub>CO<sub>2</sub>CH<sub>3</sub>NCTPP in CDCl<sub>3</sub>

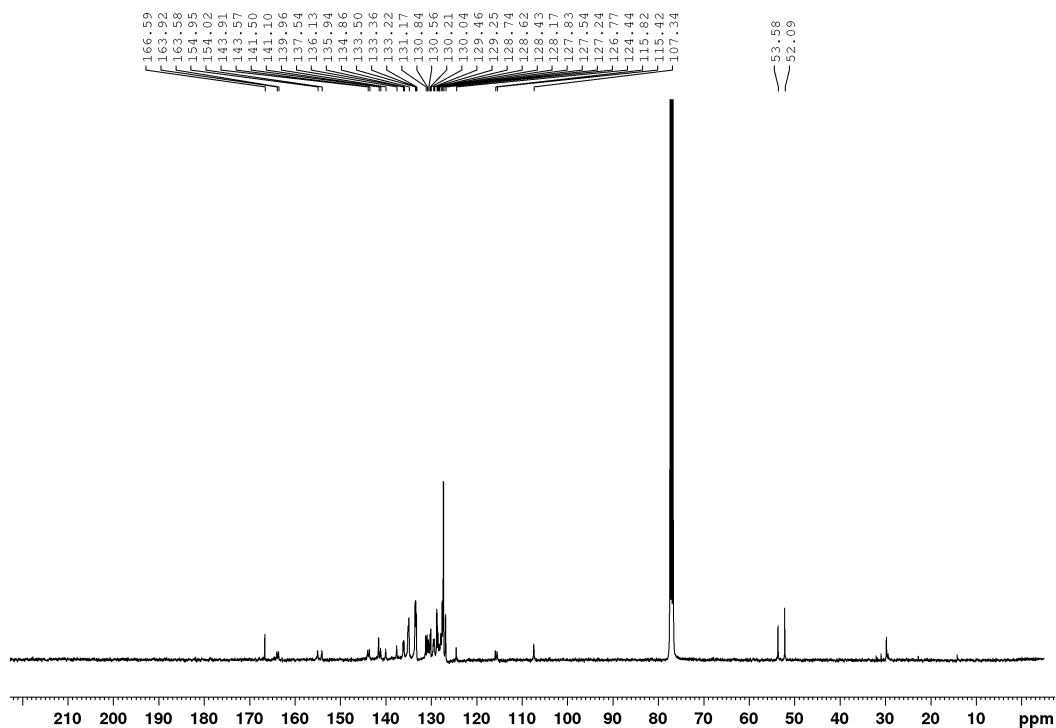

100 MHz  $^{13}\text{C}$  NMR spectrum of 2-NCH<sub>2</sub>-m-C<sub>6</sub>H<sub>4</sub>CO<sub>2</sub>CH<sub>3</sub>NCTPP in CDCl<sub>3</sub>



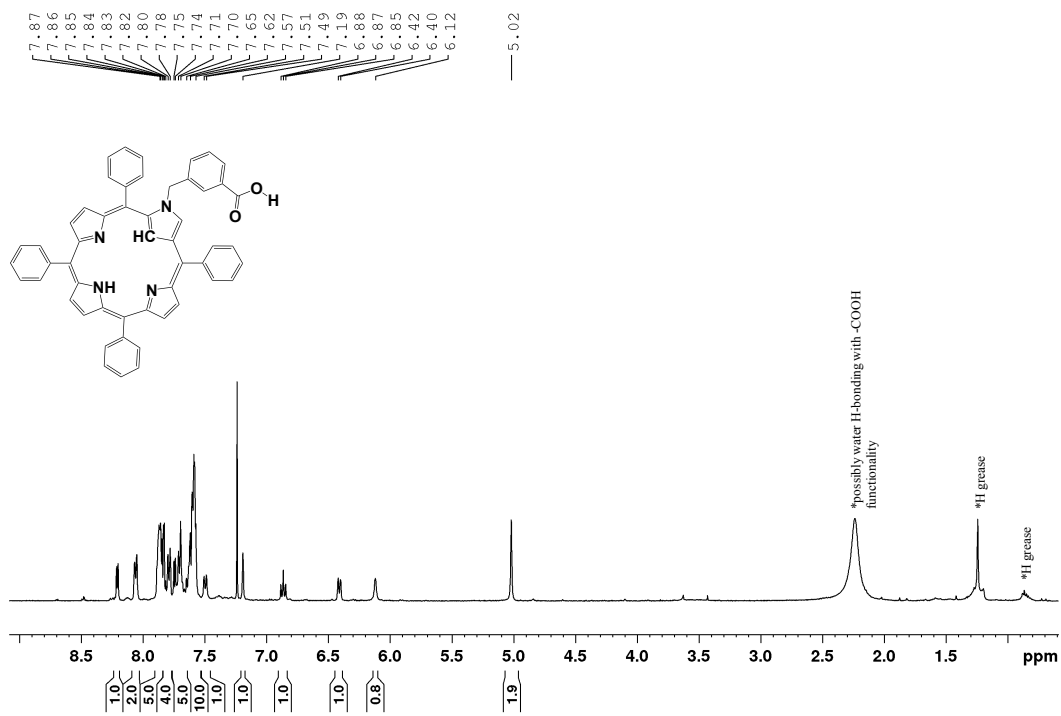

400 MHz <sup>1</sup>H NMR spectrum of 2-NCH<sub>2</sub>-m-C<sub>6</sub>H<sub>4</sub>CO<sub>2</sub>HNCTPP in CDCl<sub>3</sub>

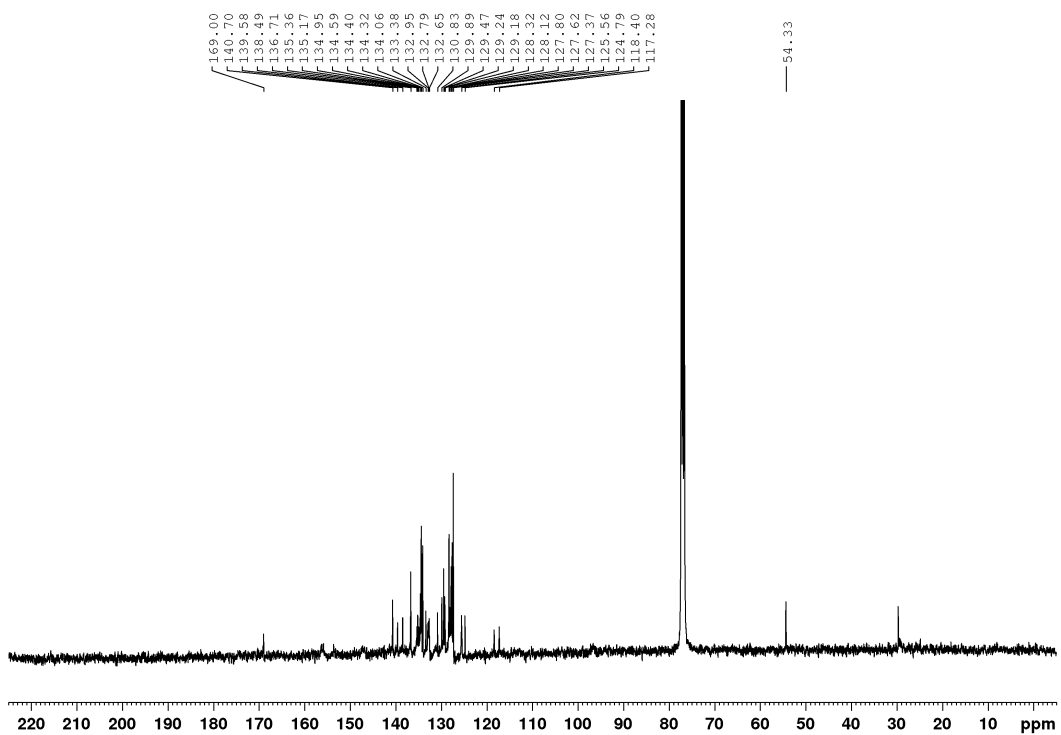

100 MHz <sup>13</sup>C NMR spectrum of 2-NCH<sub>2</sub>-m-C<sub>6</sub>H<sub>4</sub>CO<sub>2</sub>HNCTPP in CDCl<sub>3</sub>

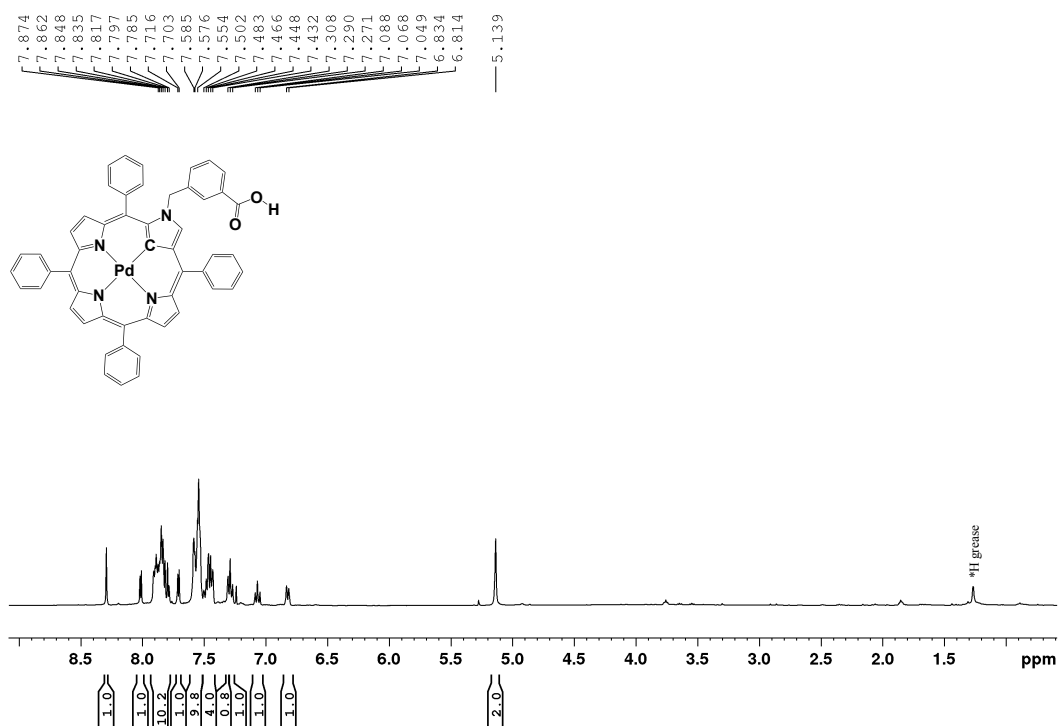

400 MHz  $^1\text{H}$  NMR spectrum of **1** in  $\text{CDCl}_3$

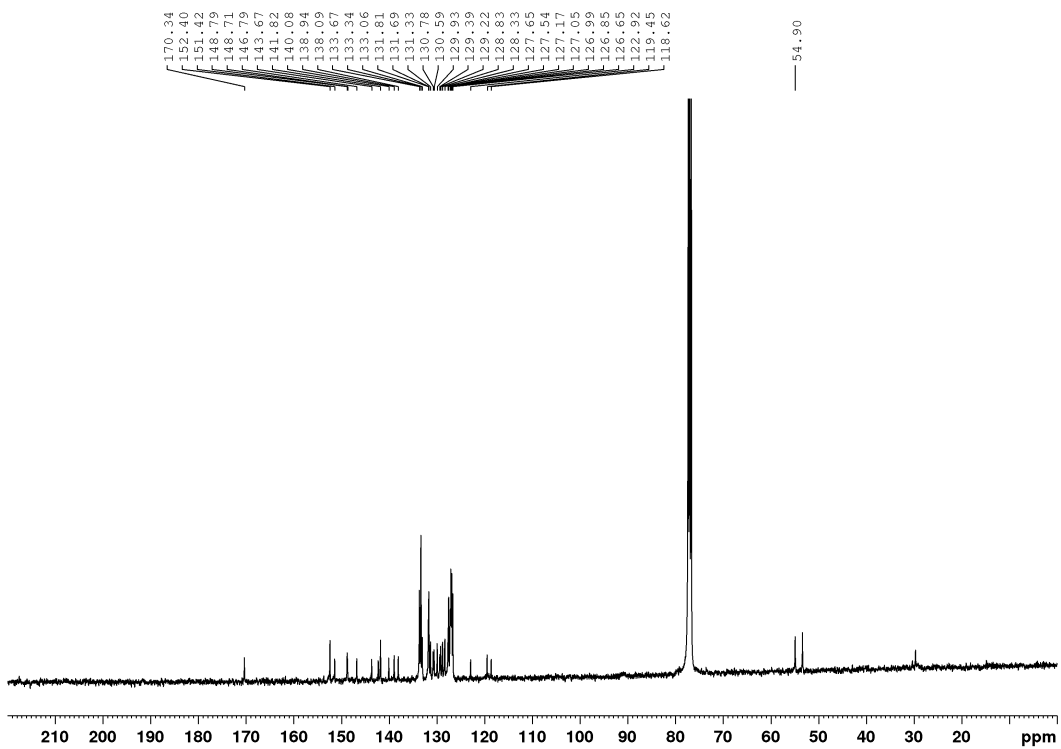

100 MHz  $^{13}\text{C}$  NMR spectrum of **1** in  $\text{CDCl}_3$

100 MHz  $^{13}\text{C}$  NMR spectrum of **1** in  $\text{CDCl}_3$

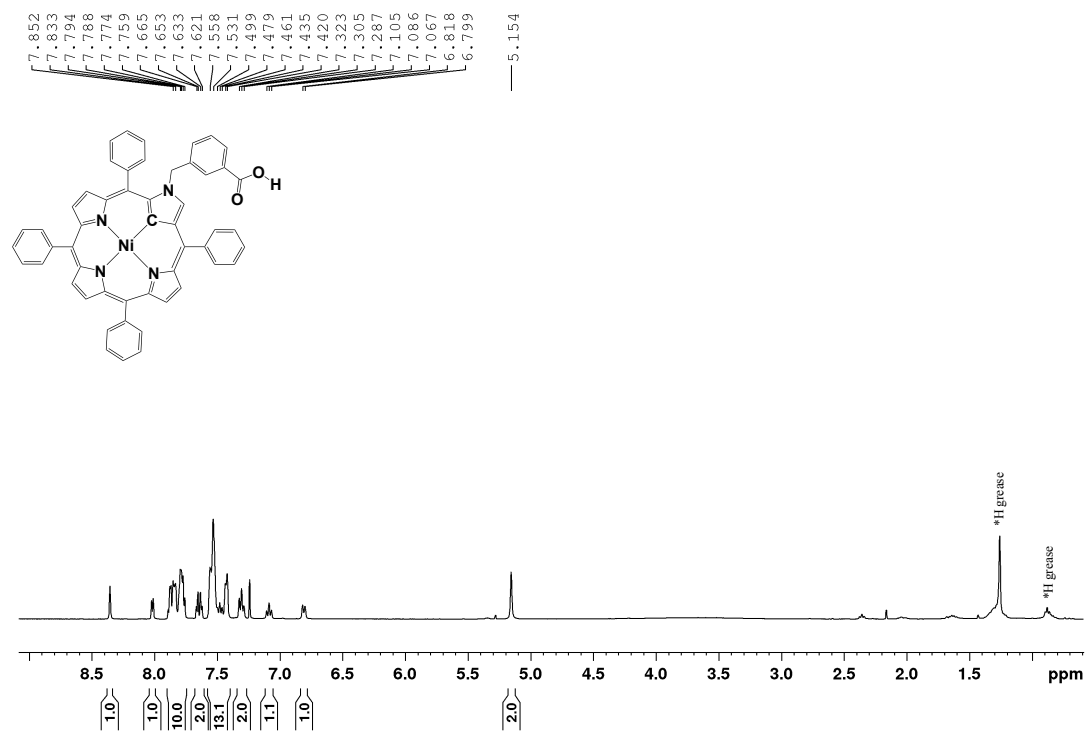

400 MHz  $^1\text{H}$  NMR spectrum of **2** in  $\text{CDCl}_3$

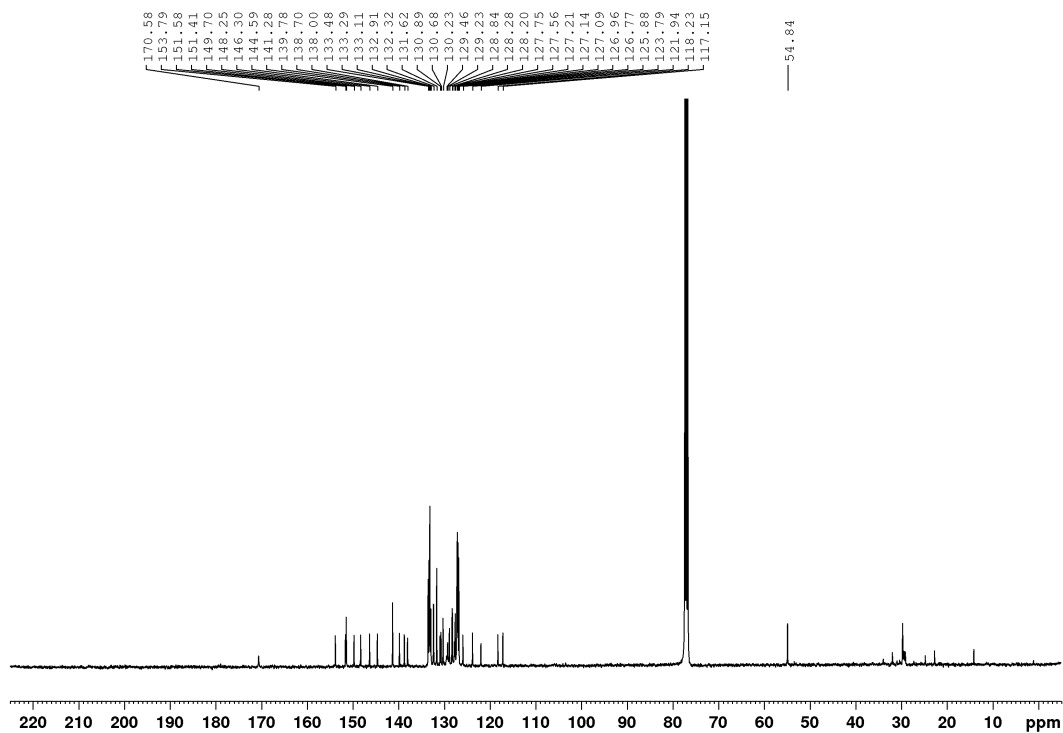

100 MHz  $^{13}\text{C}$  NMR spectrum of **2** in  $\text{CDCl}_3$

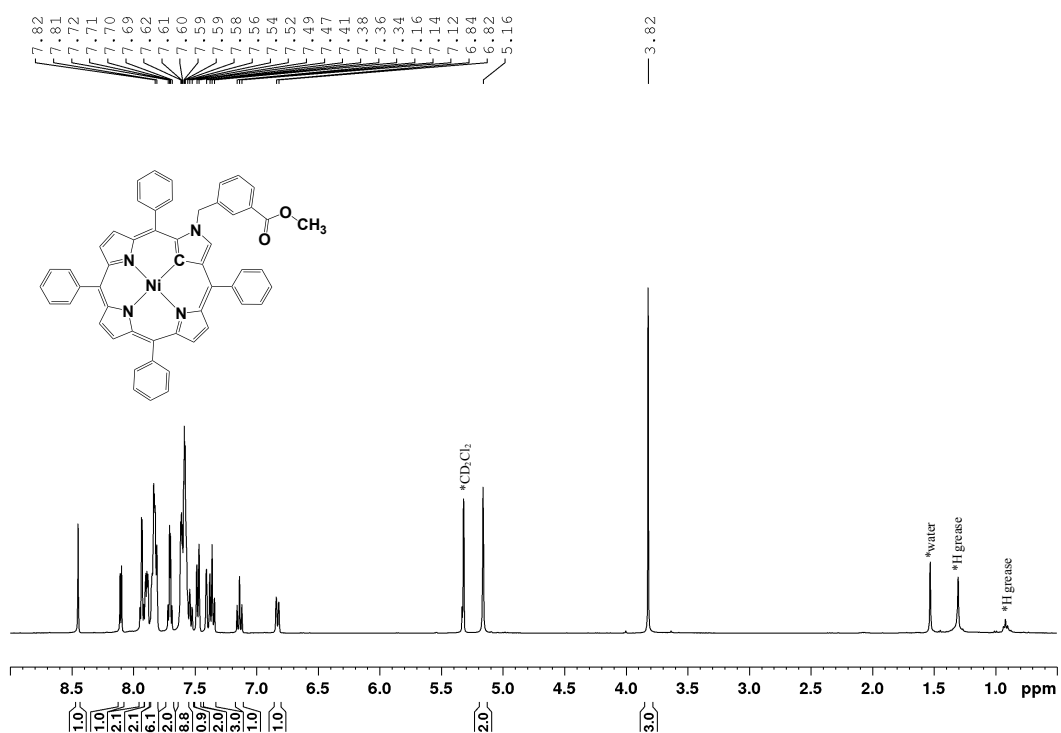

400 MHz <sup>1</sup>H NMR spectrum of **3** in CD<sub>2</sub>Cl<sub>2</sub>

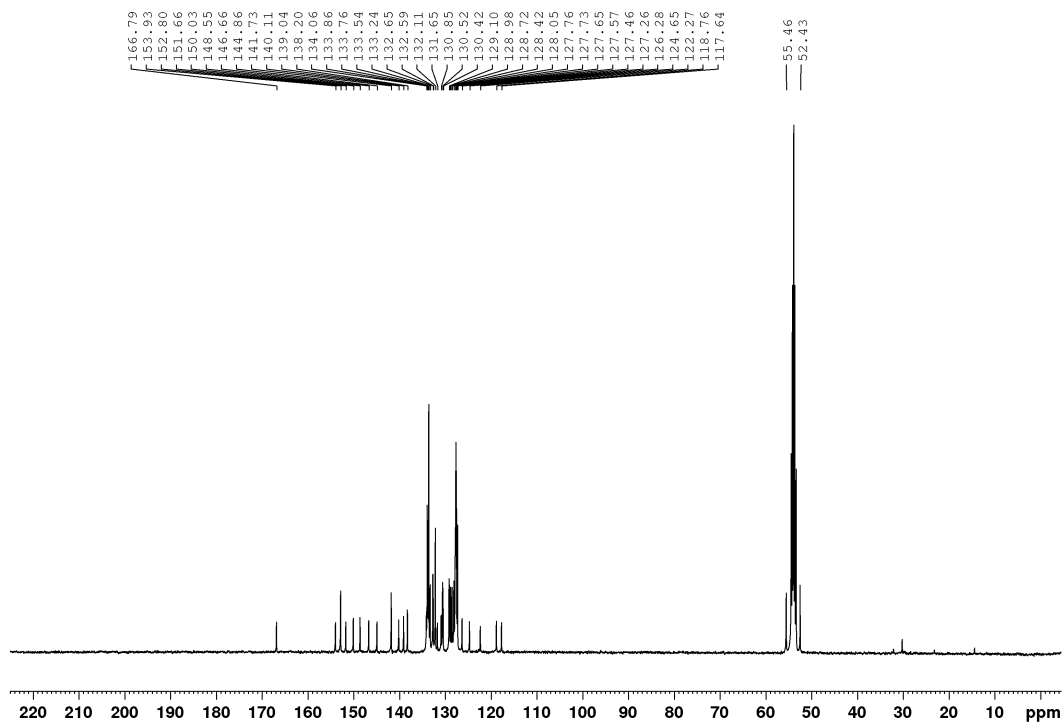

100 MHz <sup>13</sup>C NMR spectrum of **3** in CD<sub>2</sub>Cl<sub>2</sub>

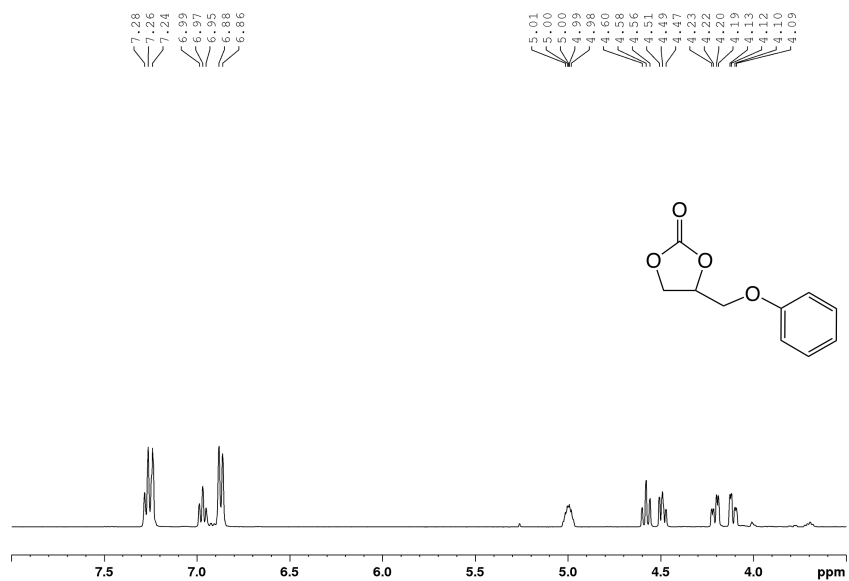

400 MHz  $^1\text{H}$  NMR spectrum of **IB** in  $\text{CDCl}_3$

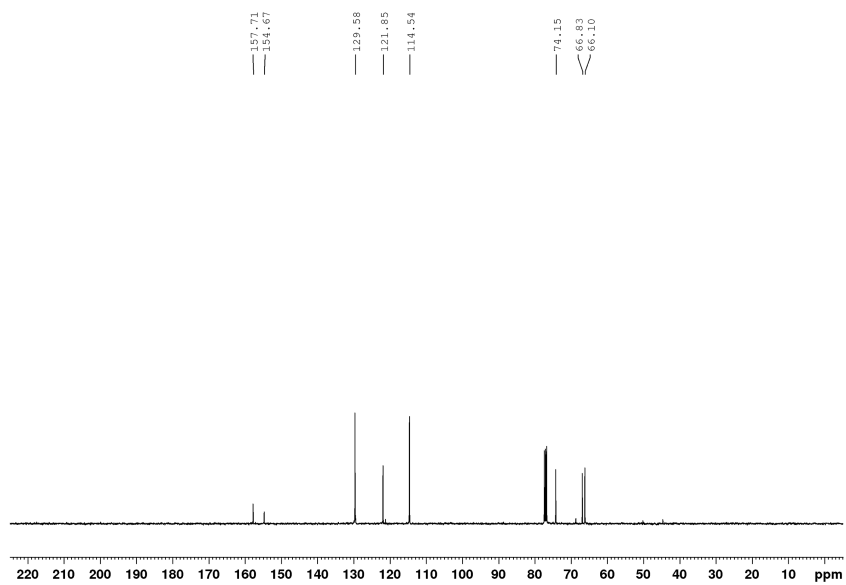

100 MHz  $^{13}\text{C}$  NMR spectrum of **IB** in  $\text{CDCl}_3$

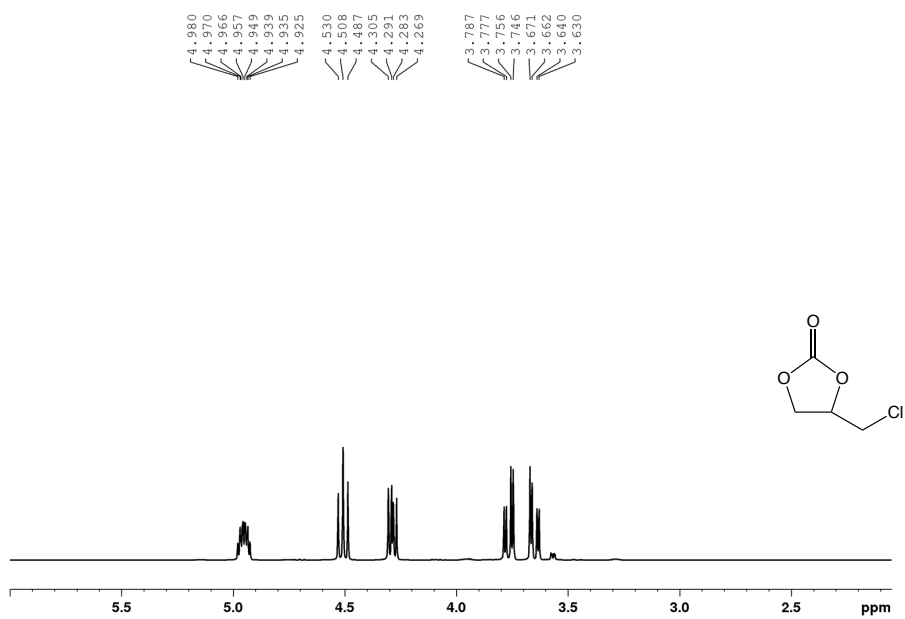

400 MHz  $^1\text{H}$  NMR spectrum of **IIB** in  $\text{CDCl}_3$

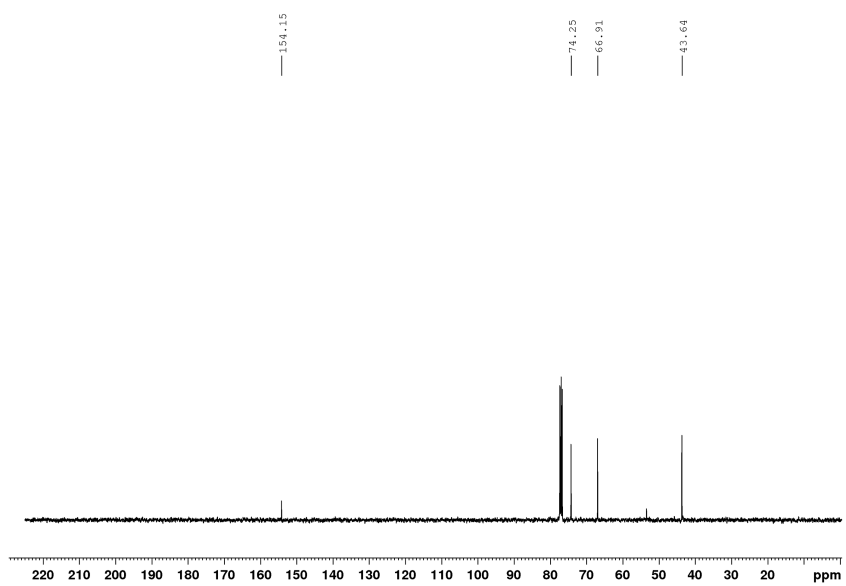

100 MHz  $^{13}\text{C}$  NMR spectrum of **IIB** in  $\text{CDCl}_3$

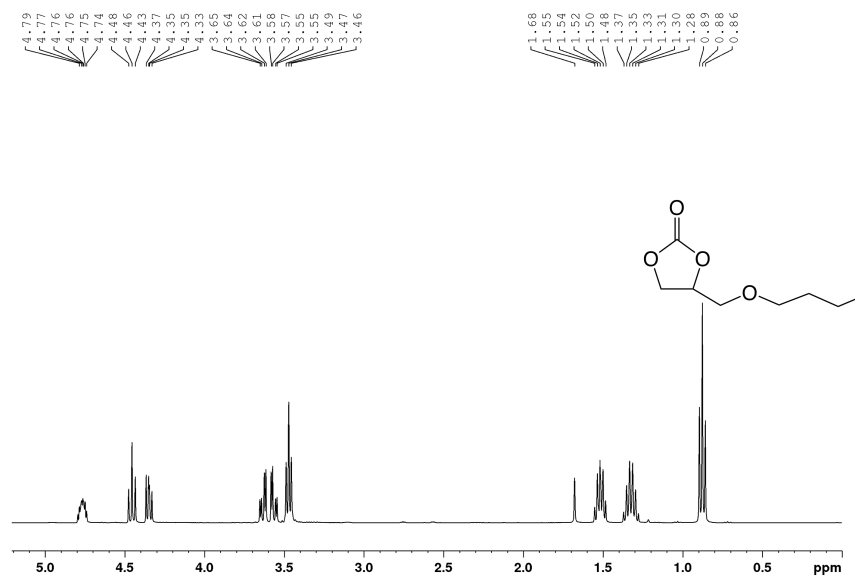

400 MHz  $^1\text{H}$  NMR spectrum of **IIIB** in  $\text{CDCl}_3$

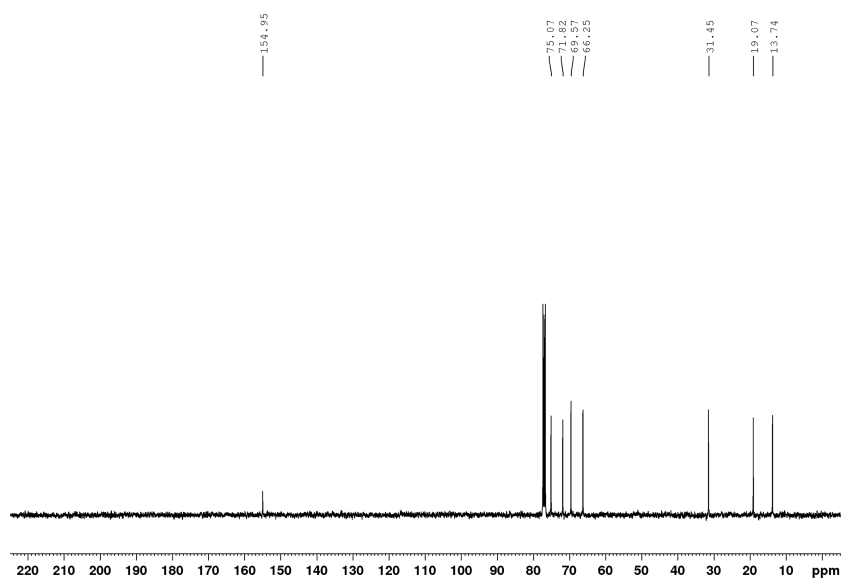

100 MHz  $^{13}\text{C}$  NMR spectrum of **IIIB** in  $\text{CDCl}_3$

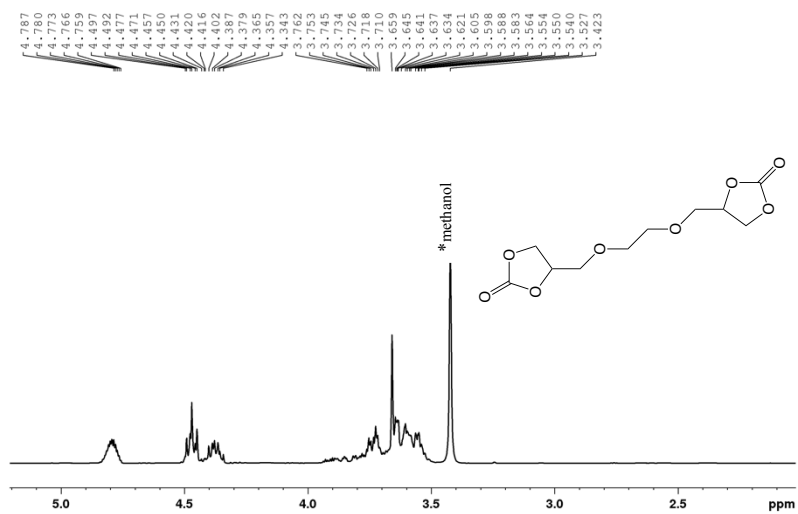

400 MHz  $^1\text{H}$  NMR spectrum of **IVB** in  $\text{CDCl}_3$

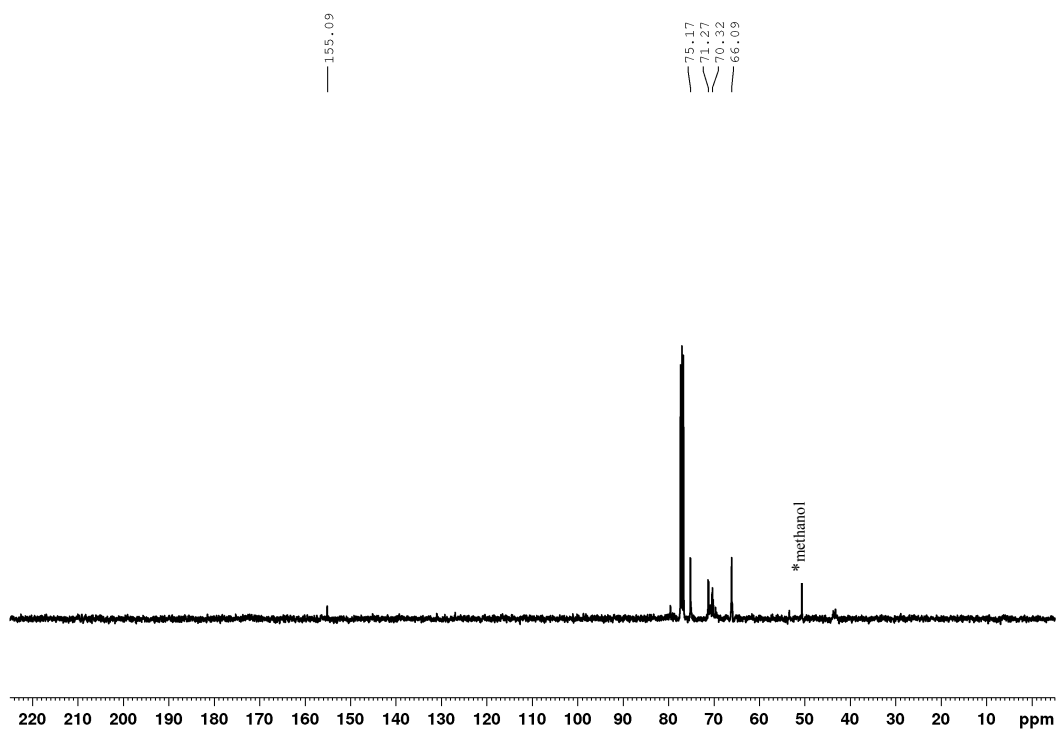

100 MHz  $^{13}\text{C}$  NMR spectrum of **IVB** in  $\text{CDCl}_3$



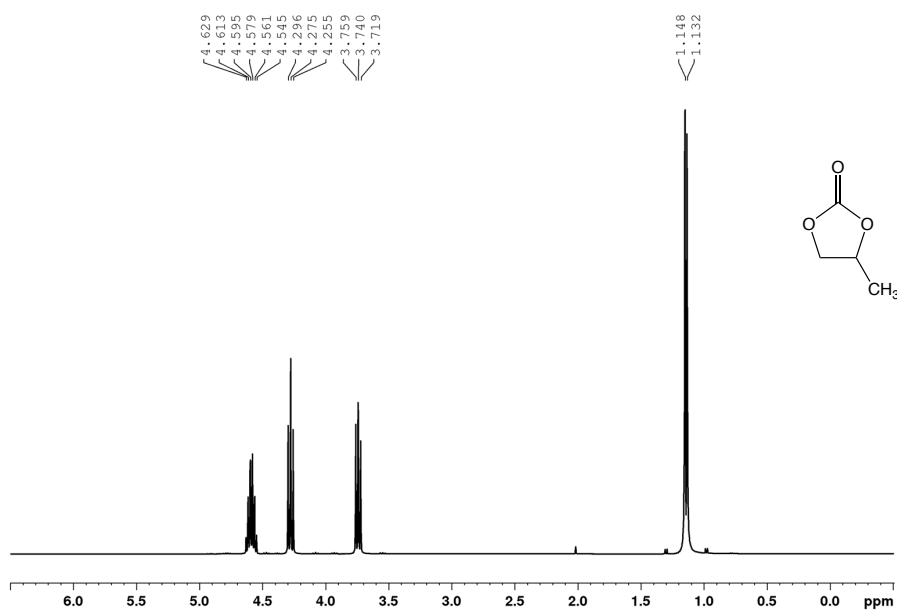

400 MHz  $^1\text{H}$  NMR spectrum of **VB** in  $\text{CDCl}_3$

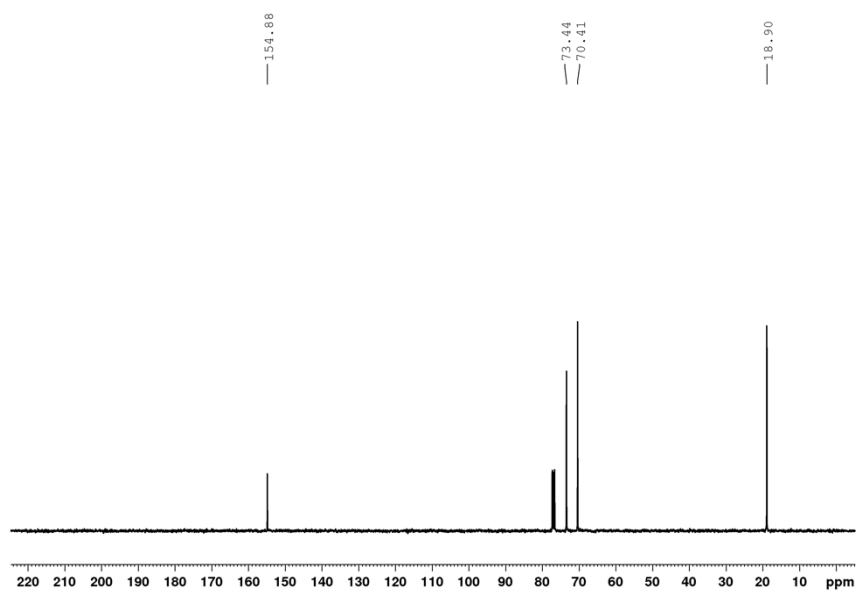

100 MHz  $^{13}\text{C}$  NMR spectrum of **VB** in  $\text{CDCl}_3$

# [5] High Resolution mass spectra

## Elemental Composition Report

Page 1

### Single Mass Analysis

Tolerance = 5.0 PPM / DBE: min = -1000.0, max = 1000.0  
Element prediction: Off  
Number of isotope peaks used for i-FIT = 2

Monoisotopic Mass, Even Electron Ions  
115 formula(e) evaluated with 1 results within limits (all results (up to 1000) for each mass)  
Elements Used:  
C: 0-1000 H: 0-1000 N: 3-4 O: 2-2  
JD001

0810\_JD001 37 (1.353)

KE267

10-Aug-2017  
16:49:30  
1: TOF MS ES+  
4.41e+004

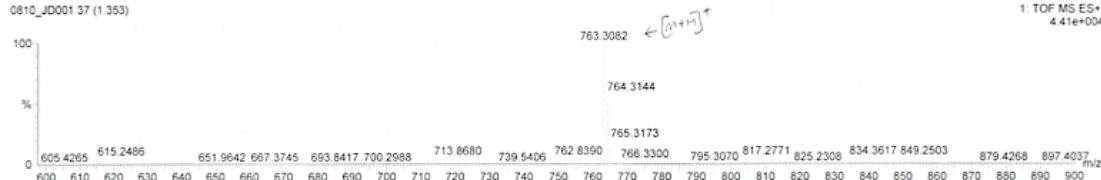

| Mass     | Calc. Mass | mDa | PPM | DBE  | i-FIT | i-FIT (Norm) | Formula       |
|----------|------------|-----|-----|------|-------|--------------|---------------|
| 763.3082 | 763.3073   | 0.9 | 1.2 | 36.5 | 40.1  | 0.0          | C53 H39 N4 O2 |

HRMS ESI spectrum of 2-NCH<sub>2</sub>-*m*-C<sub>6</sub>H<sub>4</sub>CO<sub>2</sub>CH<sub>3</sub>NCTPP

## Elemental Composition Report

Page 1

### Single Mass Analysis

Tolerance = 5.0 PPM / DBE: min = -1000.0, max = 1000.0  
Element prediction: Off  
Number of isotope peaks used for i-FIT = 2

Monoisotopic Mass, Even Electron Ions  
56 formula(e) evaluated with 1 results within limits (all results (up to 1000) for each mass)  
Elements Used:  
C: 0-400 H: 0-1000 N: 4-4 O: 2-2  
JD002

0518\_JD002 35 (1.649) Cm (35-1)

KE267 [M+H]+

18-May-2018  
15:47:17  
1: TOF MS ES+  
5.66e+003

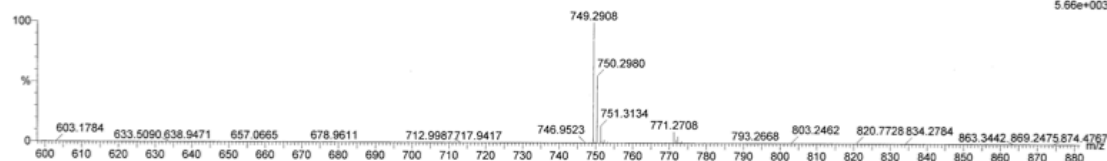

| Mass     | Calc. Mass | mDa  | PPM  | DBE  | i-FIT | i-FIT (Norm) | Formula       |
|----------|------------|------|------|------|-------|--------------|---------------|
| 749.2908 | 749.2917   | -0.9 | -1.2 | 36.5 | 39.4  | 0.0          | C52 H37 N4 O2 |

HRMS ESI spectrum of 2-NCH<sub>2</sub>-*m*-C<sub>6</sub>H<sub>4</sub>CO<sub>2</sub>HNCTPP

## Elemental Composition Report

Page 1

### Single Mass Analysis

Tolerance = 5.0 PPM / DBE: min = -1000.0, max = 1000.0  
Element prediction: Off  
Number of isotope peaks used for i-FIT = 2

Monoisotopic Mass, Even Electron Ions  
55 formula(e) evaluated with 1 results within limits (all results (up to 1000) for each mass)  
Elements Used:  
C: 0-400 H: 0-1000 N: 4-4 O: 2-2 Pd: 1-1  
JD005

0518\_JD005 22 (1.059) Cm (22-1)

KE267 [M-H]-

18-May-2018  
16:21:50  
2: TOF MS ES-  
5.05e+002

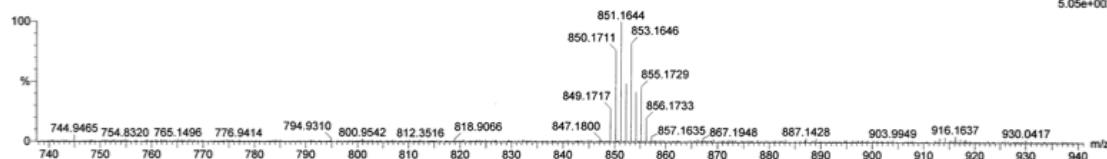

| Mass     | Calc. Mass | mDa | PPM | DBE  | i-FIT | i-FIT (Norm) | Formula          |
|----------|------------|-----|-----|------|-------|--------------|------------------|
| 851.1644 | 851.1638   | 0.6 | 0.7 | 38.5 | 49.8  | 0.0          | C52 H33 N4 O2 Pd |

HRMS ESI spectrum of 1

Elemental Composition Report

Single Mass Analysis

Tolerance = 5.0 PPM / DBE: min = -1000.0, max = 1000.0  
 Element prediction: Off  
 Number of isotope peaks used for i-FIT = 2

Monoisotopic Mass, Odd and Even Electron Ions  
 55 formula(e) evaluated with 1 results within limits (all results (up to 1000) for each mass)

Elements Used:  
 C: 0-400 H: 0-1000 N: 4-4 O: 2-2 Ni: 1-1  
 JD003

0518\_JD003 18 (0.869) Cm (18-1)

18-May-2018  
 16:45:10  
 2: TOF MS ES-  
 1.63e+003

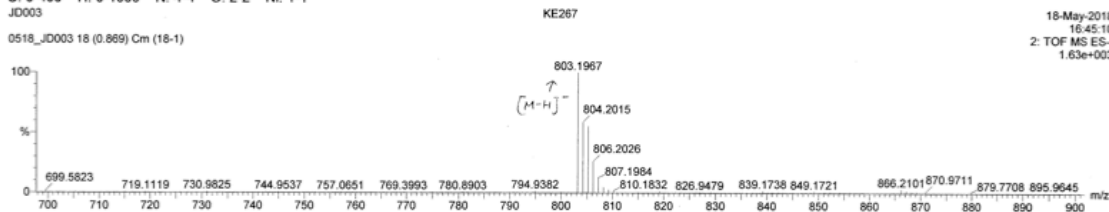

| Mass     | Calc. Mass | mDa | PPM | DBE  | i-FIT | i-FIT (Norm) | Formula          |
|----------|------------|-----|-----|------|-------|--------------|------------------|
| 803.1967 | 803.1957   | 1.0 | 1.2 | 39.0 | 14.1  | 0.0          | C52 H33 N4 O2 Ni |

HRMS ESI spectrum of 2

Elemental Composition Report

Single Mass Analysis

Tolerance = 5.0 PPM / DBE: min = -1000.0, max = 1000.0  
 Element prediction: Off  
 Number of isotope peaks used for i-FIT = 2

Monoisotopic Mass, Odd and Even Electron Ions  
 57 formula(e) evaluated with 1 results within limits (all results (up to 1000) for each mass)

Elements Used:  
 C: 0-400 H: 0-1000 N: 4-4 O: 2-2 Ni: 1-1  
 JD001a

0524\_JD001a 19 (0.888) Cm (18:19)

24-May-2018  
 14:32:51  
 1: TOF MS ES+  
 5.40e+002

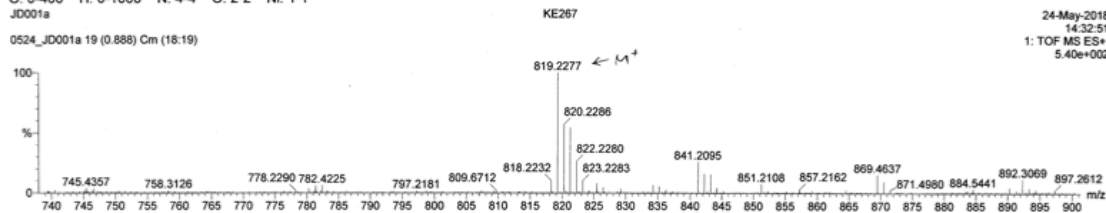

| Mass     | Calc. Mass | mDa | PPM | DBE  | i-FIT | i-FIT (Norm) | Formula          |
|----------|------------|-----|-----|------|-------|--------------|------------------|
| 819.2277 | 819.2270   | 0.7 | 0.9 | 38.0 | 27.1  | 0.0          | C53 H37 N4 O2 Ni |

HRMS ESI spectrum of 3

## [6] Elemental Analysis Report

Elemental analyses were performed by the elemental analysis service of National Chung Hsing University, Taiwan and are reported as the average of two analyses.

1. 本實驗數據為檢測結果，不得用於商業廣告、認證及法律證據使用。(This result is for academic use only, not to be used for any judicial or commercial advertising purpose.)

2. 儀器負責人: 鄭政峯 教授 檢測技術員: 陳宜絹。

(Instrument Director : Prof. Jen-Fon Jen Operator : I-Chuan Chen)

### 樣品資訊 :

|              |                     |       |            |
|--------------|---------------------|-------|------------|
| Web NO       | SEA0001002019020036 |       |            |
| Department : | 中央研究院化研所            | DATE  |            |
| Supervisor : | 洪政雄                 | 收件日 : | 2019.03.05 |
| User name :  | 洪政雄                 | 分析日 : | 2019.03.06 |

### 分析結果 :

| Sample code | Weight(mg) | N %  | C %   | H %  | O % | S % | Repeat | Charge   |
|-------------|------------|------|-------|------|-----|-----|--------|----------|
| J0005       | 1.646      | 6.53 | 68.69 | 4.48 |     |     | 1      | \$ 1,500 |
|             | 1.937      | 6.61 | 68.24 | 4.43 |     |     |        |          |
| 推測值         |            | 6.57 | 73.20 | 4.02 |     |     |        |          |
| J0003       | 2.002      | 6.05 | 77.15 | 4.98 |     |     | 1      | \$ 1,500 |
|             | 2.036      | 6.19 | 76.86 | 4.37 |     |     |        |          |
| 推測值         |            | 6.96 | 77.53 | 4.25 |     |     |        |          |
| J0001a      | 2.385      | 5.17 | 73.99 | 4.53 |     |     | 1      | \$ 1,500 |
|             | 1.758      | 5.14 | 73.99 | 4.39 |     |     |        |          |
| 推測值         |            | 6.84 | 77.67 | 4.43 |     |     |        |          |

### 備註:

使用儀器: Elemental vario EL CUBE( CHN-OS Rapid, German), Accuracy: 0.1%, Precision: 0.2%

|   | 標準品             | N %   | C %   | H %  | O %   | S %   |
|---|-----------------|-------|-------|------|-------|-------|
| ★ | Acetanilide     | 10.36 | 71.09 | 6.71 |       |       |
|   | Benzoic acid    |       |       |      | 26.20 |       |
|   | Sulfanilic acid | 8.09  | 41.60 | 4.07 |       | 18.50 |
|   | Daily standard  | 10.30 | 71.02 | 6.69 |       |       |

Labels:

JD005 = complex 1

JD003 = complex 2

JD001a = complex 3

## [7] Theoretical calculations coordinates and relative energies

The optimized structures shown in Fig. 3 are the results of computations performed at M06/6-31g(d) level. Following are their respective coordinates. The energies of the ring-opening intermediates (namely, **IntIA** and **IntVA**) are relative to the energies of the corresponding initial states of the catalyst and epoxides (namely, **2COO-IA** and **2COO-VA**).

### 2COO<sup>-</sup>-IA

| Atom | Coordinates (Angstroms) |             |             |
|------|-------------------------|-------------|-------------|
|      | X                       | Y           | Z           |
| C    | 1.61138000              | -2.77965200 | -2.15559200 |
| C    | 2.64202700              | -1.91914200 | -2.32534800 |
| C    | 2.19916300              | -0.64661100 | -1.83583800 |
| N    | 0.88349000              | -0.69525800 | -1.45154000 |
| C    | 0.52471000              | -2.02363900 | -1.61105400 |
| C    | -3.91624700             | -1.08667600 | -0.93727400 |
| N    | -3.14147900             | -2.17590800 | -0.92415800 |
| C    | -1.79531400             | -1.71518400 | -1.06645500 |
| C    | -1.75637000             | -0.31236200 | -1.09424900 |
| C    | -3.13120100             | 0.06392700  | -1.04508500 |
| C    | 3.51947800              | 2.61750700  | -0.52849300 |
| C    | 2.74082200              | 3.56377800  | 0.03419100  |
| C    | 1.37304300              | 3.15861300  | -0.19471700 |
| N    | 1.32192700              | 1.93978800  | -0.81769200 |
| C    | 2.62824500              | 1.61057200  | -1.05628000 |
| C    | -3.21982900             | 3.78255300  | -0.65672700 |
| C    | -2.13682300             | 4.47032400  | -0.23684200 |
| C    | -1.02355400             | 3.55517100  | -0.26800700 |
| N    | -1.40549900             | 2.32574300  | -0.71299300 |
| C    | -2.78164900             | 2.43724000  | -0.91098000 |
| C    | -0.72780500             | -2.56921700 | -1.36890900 |
| C    | -3.64552800             | 1.38080100  | -1.07126200 |
| C    | 3.06263800              | 0.44318700  | -1.65740400 |
| C    | 0.27451400              | 3.94783900  | 0.08643400  |
| C    | -0.88819700             | -4.02854900 | -1.57824400 |
| C    | -5.10345300             | 1.61794300  | -1.17023400 |
| C    | 4.48863400              | 0.33241500  | -2.04776900 |
| C    | -1.66143500             | -4.50592000 | -2.64087400 |
| C    | -1.81375300             | -5.87247000 | -2.84575400 |
| C    | -1.19310800             | -6.77776000 | -1.98922100 |
| C    | -0.41198700             | -6.30954100 | -0.93667900 |
| C    | -0.24873500             | -4.94350500 | -0.73262200 |
| C    | -5.64488800             | 2.30587100  | -2.26127000 |
| C    | -7.01386400             | 2.52983400  | -2.35420900 |
| C    | -7.86814500             | 2.06705600  | -1.35833000 |
| C    | -7.34194100             | 1.38556700  | -0.26499100 |
| C    | -5.97274900             | 1.16487300  | -0.17026200 |
| C    | 5.32554100              | -0.64231400 | -1.49472700 |
| C    | 6.66329900              | -0.71920500 | -1.86429700 |
| C    | 7.19169300              | 0.17787900  | -2.78759500 |
| C    | 6.37188200              | 1.15860900  | -3.33766700 |
| C    | 5.03325800              | 1.23348100  | -2.97017500 |
| C    | 0.46115900              | 5.27902300  | 0.71638600  |
| C    | 1.13115400              | 6.31306900  | 0.05532600  |
| C    | 1.28086000              | 7.56131100  | 0.65004000  |
| C    | 0.75767900              | 7.79775300  | 1.91740200  |
| C    | 0.08869300              | 6.77702700  | 2.58654600  |

|    |             |             |             |
|----|-------------|-------------|-------------|
| C  | -0.05791100 | 5.52956900  | 1.99135100  |
| Ni | -0.24502700 | 0.81061100  | -1.02848200 |
| C  | -1.65126400 | -3.07279500 | 3.05593400  |
| C  | -0.16256200 | -3.14009500 | 3.42082000  |
| O  | 0.13365100  | -2.75629800 | 4.56909000  |
| O  | 0.59595900  | -3.50386700 | 2.48362100  |
| C  | -0.78234000 | -0.08130600 | 2.34027300  |
| C  | 0.62074900  | -0.32944200 | 2.03892300  |
| C  | 1.61468500  | -0.38264800 | 3.15758200  |
| O  | 0.03044400  | 0.95008000  | 1.80560100  |
| C  | -2.62306000 | -2.61412400 | 3.94375900  |
| C  | -3.93651700 | -2.43246000 | 3.51611100  |
| C  | -4.29002600 | -2.69201000 | 2.19194600  |
| C  | -3.32808900 | -3.16922700 | 1.30088800  |
| C  | -2.02955700 | -3.36333500 | 1.75435800  |
| C  | -3.60786200 | -3.35714000 | -0.16426300 |
| O  | 2.91000500  | 0.04957300  | 2.74398300  |
| C  | 3.79667600  | -0.86518200 | 2.29020300  |
| C  | 5.10273600  | -0.38956900 | 2.11393900  |
| C  | 6.10943300  | -1.24514700 | 1.69494800  |
| C  | 5.82699600  | -2.58269900 | 1.41995000  |
| C  | 4.52146000  | -3.03992400 | 1.57421300  |
| C  | 3.49595000  | -2.20338200 | 2.01070000  |
| H  | 1.57408800  | -3.83554200 | -2.39464600 |
| H  | 3.62699000  | -2.12388700 | -2.72536600 |
| H  | -4.99040700 | -1.17962200 | -0.80334900 |
| H  | 4.60140800  | 2.55241400  | -0.54675700 |
| H  | 3.04405000  | 4.45622100  | 0.56867900  |
| H  | -4.24384600 | 4.12810000  | -0.74119700 |
| H  | -2.07517100 | 5.50862700  | 0.06763000  |
| H  | -2.14764600 | -3.78930400 | -3.30293700 |
| H  | -2.41798700 | -6.23135300 | -3.67824100 |
| H  | -1.31820300 | -7.84902200 | -2.14269500 |
| H  | 0.07137800  | -7.01159300 | -0.25929200 |
| H  | 0.34233100  | -4.57401400 | 0.10986800  |
| H  | -4.97194300 | 2.66177300  | -3.04118300 |
| H  | -7.41593300 | 3.06541900  | -3.21336800 |
| H  | -8.94082600 | 2.24044200  | -1.43184300 |
| H  | -8.00091000 | 1.03183200  | 0.52691100  |
| H  | -5.55718000 | 0.65466900  | 0.69946600  |
| H  | 4.92723200  | -1.33004400 | -0.74894100 |
| H  | 7.29844100  | -1.48116300 | -1.41279700 |
| H  | 8.24119800  | 0.11703800  | -3.07381300 |
| H  | 6.77482900  | 1.86781100  | -4.06017700 |
| H  | 4.38588700  | 1.99701100  | -3.40169200 |
| H  | 1.53168100  | 6.12657700  | -0.94119200 |
| H  | 1.80325300  | 8.35534300  | 0.11741400  |
| H  | 0.87292800  | 8.77551200  | 2.38378700  |
| H  | -0.31791100 | 6.95087700  | 3.58208600  |
| H  | -0.57297200 | 4.72237000  | 2.51190000  |
| H  | -1.55886300 | -0.46871600 | 1.67245000  |
| H  | -1.08316900 | 0.04253600  | 3.38550500  |
| H  | 0.86591100  | -0.88385700 | 1.12614800  |
| H  | 1.64220600  | -1.37826800 | 3.62330900  |
| H  | 1.30185500  | 0.33866300  | 3.92443200  |
| H  | -2.31035400 | -2.37971200 | 4.96095100  |
| H  | -4.69166400 | -2.06648900 | 4.21269600  |
| H  | -5.31483000 | -2.52263900 | 1.85030700  |

|   |             |             |             |
|---|-------------|-------------|-------------|
| H | -1.24412300 | -3.70635600 | 1.08992000  |
| H | 5.29709000  | 0.65946100  | 2.33305900  |
| H | 7.12201500  | -0.85934200 | 1.57133400  |
| H | 6.61531300  | -3.25837800 | 1.08808300  |
| H | 4.28093800  | -4.08157300 | 1.36217100  |
| H | 2.49385600  | -2.62001400 | 2.16096900  |
| H | -4.68480300 | -3.44291600 | -0.36648000 |
| H | -3.12171600 | -4.25580400 | -0.55444800 |

**2COO<sup>-</sup>-VA**

| Atom | Coordinates (Angstroms) |             |             |
|------|-------------------------|-------------|-------------|
|      | X                       | Y           | Z           |
| C    | -2.19628900             | -2.13593300 | -2.12148000 |
| C    | -1.35130500             | -3.15974100 | -1.84586500 |
| C    | -0.21735300             | -2.58752100 | -1.18776700 |
| N    | -0.32604900             | -1.22578700 | -1.09805300 |
| C    | -1.58998500             | -0.95016000 | -1.59928700 |
| C    | -1.19566300             | 3.45974400  | -0.37805900 |
| N    | -2.18193500             | 2.60517700  | -0.63919600 |
| C    | -1.57019600             | 1.34329700  | -0.91011400 |
| C    | -0.17889900             | 1.42695400  | -0.73643000 |
| C    | 0.04217400              | 2.80863000  | -0.47939400 |
| C    | 3.07791900              | -3.53454700 | 0.38064400  |
| C    | 4.08720800              | -2.65982300 | 0.57062400  |
| C    | 3.60010400              | -1.36994100 | 0.14233900  |
| N    | 2.29321800              | -1.44594400 | -0.26032700 |
| C    | 1.98052800              | -2.78414400 | -0.17697900 |
| C    | 3.76178500              | 3.25819100  | -0.38766300 |
| C    | 4.62132500              | 2.22397300  | -0.26026800 |
| C    | 3.82283800              | 1.03004400  | -0.16883700 |
| N    | 2.49024300              | 1.30985100  | -0.31333700 |
| C    | 2.43896600              | 2.70288800  | -0.38044700 |
| C    | 1.28950000              | 3.45956200  | -0.38757700 |
| C    | 0.82592000              | -3.36079000 | -0.65959000 |
| C    | 4.37646100              | -0.22279200 | 0.11582300  |
| C    | 1.35273200              | 4.93473100  | -0.31877900 |
| C    | 0.68180300              | -4.83891800 | -0.64374800 |
| C    | 1.99989000              | 5.58304600  | 0.74099400  |
| C    | 2.04800700              | 6.97018700  | 0.80603900  |
| C    | 1.44707800              | 7.73987900  | -0.18519700 |
| C    | 0.79484100              | 7.11057700  | -1.24103800 |
| C    | 0.74586400              | 5.72321600  | -1.30518000 |
| C    | -0.28964100             | -5.44471000 | 0.16118500  |
| C    | -0.42343400             | -6.82898500 | 0.16759800  |
| C    | 0.40129800              | -7.62266900 | -0.62474700 |
| C    | 1.37022100              | -7.02672700 | -1.42584800 |
| C    | 1.50851000              | -5.64306500 | -1.43409400 |
| C    | 5.82465300              | -0.32472400 | 0.42461700  |
| C    | 6.67416600              | -1.09697100 | -0.37539200 |
| C    | 8.02967700              | -1.20440500 | -0.08498500 |
| C    | 8.56458100              | -0.53730600 | 1.01249800  |
| C    | 7.73256900              | 0.23435900  | 1.81802000  |
| C    | 6.37725400              | 0.33682600  | 1.52752000  |
| Ni   | 1.06901300              | 0.02251400  | -0.62194000 |
| C    | -4.67846500             | 0.41279900  | 2.53759900  |
| C    | -5.43273200             | -0.93196900 | 2.54852300  |
| O    | -5.49381200             | -1.50417500 | 3.65202600  |

|   |             |             |             |
|---|-------------|-------------|-------------|
| O | -5.83455700 | -1.31590400 | 1.41971800  |
| C | -2.99199600 | -2.53177500 | 1.48583700  |
| C | -2.15199100 | -2.04637800 | 2.57155200  |
| C | -1.11857800 | -0.98249300 | 2.36290100  |
| O | -1.89492000 | -3.31052700 | 1.96016600  |
| C | -4.00536500 | 0.89230800  | 3.65800300  |
| C | -3.21024100 | 2.03512000  | 3.57204100  |
| C | -3.05583000 | 2.69395800  | 2.35570700  |
| C | -3.74287400 | 2.23454100  | 1.22845800  |
| C | -4.56885300 | 1.12467500  | 1.34824100  |
| C | -3.54415100 | 2.86280000  | -0.12421200 |
| H | -3.16838500 | -2.17790200 | -2.59737800 |
| H | -1.47987300 | -4.21522600 | -2.05289800 |
| H | -1.41075200 | 4.48284800  | -0.08098900 |
| H | 5.07307200  | -2.84608600 | 0.98028900  |
| H | 3.98861600  | 4.31306800  | -0.49056000 |
| H | 5.70405000  | 2.24862600  | -0.23277700 |
| H | 2.45483500  | 4.98044700  | 1.52614300  |
| H | 2.55138600  | 7.45345300  | 1.64239200  |
| H | 1.48440900  | 8.82696800  | -0.13311400 |
| H | 0.32495000  | 7.70323700  | -2.02482500 |
| H | 0.24970000  | 5.23040900  | -2.14087800 |
| H | -0.91968700 | -4.81561100 | 0.79396200  |
| H | -1.17846300 | -7.28967900 | 0.80308800  |
| H | 0.28968700  | -8.70648700 | -0.61691900 |
| H | 2.01787500  | -7.64049500 | -2.05129600 |
| H | 2.26129800  | -5.16731800 | -2.06318600 |
| H | 6.25338800  | -1.61402500 | -1.23760200 |
| H | 8.67211900  | -1.80999700 | -0.72320800 |
| H | 9.62644700  | -0.61962100 | 1.24060200  |
| H | 8.13978400  | 0.75365700  | 2.68475400  |
| H | 5.72324000  | 0.93315300  | 2.16340100  |
| H | -0.26555100 | -1.11712500 | 3.04270500  |
| H | -1.54988300 | 0.01239500  | 2.54884300  |
| H | -4.10785300 | 0.32752600  | 4.58458700  |
| H | -2.68251000 | 2.40223400  | 4.45309200  |
| H | -2.39676200 | 3.56252400  | 2.28336700  |
| H | -5.14389000 | 0.76171100  | 0.50160200  |
| H | -0.73502000 | -1.00473100 | 1.33368300  |
| H | -3.99228000 | -2.91214200 | 1.69888000  |
| H | -2.85334500 | -2.10261600 | 0.48762800  |
| H | -2.57455400 | -2.12574500 | 3.57834600  |
| H | -3.63476500 | 3.95808500  | -0.09088600 |
| H | -4.28331700 | 2.49023400  | -0.84020200 |
| C | -2.25567500 | 0.26209400  | -1.47525500 |
| H | 3.05263400  | -4.59684100 | 0.59349600  |
| C | -3.62515800 | 0.37981500  | -2.03065000 |
| C | -3.85883100 | 1.24977000  | -3.10206800 |
| C | -4.69325500 | -0.35568800 | -1.50632300 |
| C | -5.13641300 | 1.39146700  | -3.63069300 |
| H | -3.02438300 | 1.81840500  | -3.51361500 |
| C | -5.97443200 | -0.19585400 | -2.02421500 |
| H | -4.56645100 | -0.99545900 | -0.63009000 |
| C | -6.19920800 | 0.67271000  | -3.08701100 |
| H | -5.30432800 | 2.07030400  | -4.46620900 |
| H | -6.79245600 | -0.73937400 | -1.55427300 |
| H | -7.20370200 | 0.79777000  | -3.48996000 |



**IntIA** (Energy: 18.8 kcal/mol)

| Atom | Coordinates (Angstroms) |             |             |
|------|-------------------------|-------------|-------------|
|      | X                       | Y           | Z           |
| C    | -2.01285500             | -2.96313000 | -1.98430800 |
| C    | -0.86124700             | -3.60325000 | -1.66621100 |
| C    | 0.11829200              | -2.58299700 | -1.42724700 |
| N    | -0.42393600             | -1.33563400 | -1.53472800 |
| C    | -1.75445500             | -1.56197300 | -1.83499600 |
| C    | -2.83513200             | 2.65174800  | -0.42953200 |
| N    | -3.47373100             | 1.59260400  | -0.93972900 |
| C    | -2.46494400             | 0.68079000  | -1.38324100 |
| C    | -1.19218200             | 1.21824400  | -1.14907800 |
| C    | -1.45930700             | 2.49757300  | -0.58346700 |
| C    | 3.85183500              | -2.17490100 | -1.34206200 |
| C    | 4.46803000              | -0.98388500 | -1.50028100 |
| C    | 3.43863400              | 0.02718200  | -1.39420000 |
| N    | 2.20396700              | -0.54314900 | -1.26482400 |
| C    | 2.44080700              | -1.89281500 | -1.21857700 |
| C    | 1.83966600              | 4.24771100  | -0.29002700 |
| C    | 2.99642500              | 3.68265100  | -0.69601300 |
| C    | 2.69555400              | 2.30907700  | -1.01760600 |
| N    | 1.37155200              | 2.03755700  | -0.84766000 |
| C    | 0.82414200              | 3.23630300  | -0.39620800 |
| C    | -2.76192300             | -0.60658100 | -1.83297400 |
| C    | -0.51366400             | 3.48000000  | -0.20770200 |
| C    | 1.47572300              | -2.87441200 | -1.20856000 |
| C    | 3.69954500              | 1.38605600  | -1.33963500 |
| C    | -4.11693400             | -0.98640800 | -2.30336600 |
| C    | -0.96394500             | 4.77924100  | 0.33475400  |
| C    | 1.89538100              | -4.26869100 | -0.92823000 |
| C    | -4.94491300             | -1.85973200 | -1.59219600 |
| C    | -6.22510700             | -2.15186400 | -2.05091300 |
| C    | -6.69480500             | -1.58351300 | -3.23072800 |
| C    | -5.87299100             | -0.72447100 | -3.95641600 |
| C    | -4.59615300             | -0.42856300 | -3.49444900 |
| C    | -1.83023600             | 5.60668500  | -0.39115100 |
| C    | -2.25153100             | 6.82712700  | 0.12399600  |
| C    | -1.81685300             | 7.24427000  | 1.37824000  |
| C    | -0.95844900             | 6.43091800  | 2.11192700  |
| C    | -0.53659000             | 5.21116000  | 1.59643000  |
| C    | 2.36347800              | -4.57634200 | 0.35426500  |
| C    | 2.78293200              | -5.86513200 | 0.66438800  |
| C    | 2.74072500              | -6.86577900 | -0.30195500 |
| C    | 2.27941500              | -6.56969600 | -1.58153800 |
| C    | 1.86142500              | -5.27996600 | -1.89215700 |
| C    | 5.09777900              | 1.86914700  | -1.46516400 |
| C    | 6.04400300              | 1.59108900  | -0.47248500 |
| C    | 7.34930800              | 2.05811300  | -0.58198300 |
| C    | 7.73048700              | 2.81918400  | -1.68317700 |
| C    | 6.79727200              | 3.10999500  | -2.67361700 |
| C    | 5.49378800              | 2.63802000  | -2.56389900 |
| Ni   | 0.46953100              | 0.34755400  | -1.17166700 |
| C    | -4.42625000             | -0.67865800 | 2.61741500  |
| C    | -3.46609500             | -1.01800300 | 3.72091600  |
| O    | -3.78650900             | -0.81123800 | 4.87320600  |
| O    | -2.28267700             | -1.55872800 | 3.46020900  |
| C    | -1.86760000             | -2.12130100 | 2.19990900  |
| C    | -0.64167000             | -1.37945100 | 1.65358800  |

|   |             |             |             |
|---|-------------|-------------|-------------|
| C | 0.44668500  | -1.39701600 | 2.74041200  |
| O | -0.91248500 | -0.16166300 | 1.19224900  |
| C | -5.75463200 | -1.03240400 | 2.85593200  |
| C | -6.74577700 | -0.68171500 | 1.94992400  |
| C | -6.41055400 | 0.07160500  | 0.83467500  |
| C | -5.09068000 | 0.46472300  | 0.60487400  |
| C | -4.07892600 | 0.06943600  | 1.48391500  |
| C | -4.86075600 | 1.34270200  | -0.60352000 |
| O | 1.70850800  | -1.22813500 | 2.10084700  |
| C | 2.81388600  | -1.15479900 | 2.85989800  |
| C | 4.03428200  | -1.10019900 | 2.16887200  |
| C | 5.22917900  | -1.03913700 | 2.86547100  |
| C | 5.24378000  | -1.02682900 | 4.26123100  |
| C | 4.03508000  | -1.08016400 | 4.94252600  |
| C | 2.82227800  | -1.14660600 | 4.25911700  |
| H | -2.96904000 | -3.39936000 | -2.24790100 |
| H | -0.67761900 | -4.66976500 | -1.61677900 |
| H | -3.39143500 | 3.45121500  | 0.05246800  |
| H | 4.28456700  | -3.16926400 | -1.34943400 |
| H | 5.52200200  | -0.78162600 | -1.65572600 |
| H | 1.66565500  | 5.26995200  | 0.02608500  |
| H | 3.98087500  | 4.13195800  | -0.75853400 |
| H | -4.58916500 | -2.27848100 | -0.65033100 |
| H | -6.86437700 | -2.81400900 | -1.46805600 |
| H | -7.69937800 | -1.81044200 | -3.58574100 |
| H | -6.22984000 | -0.28180200 | -4.88573600 |
| H | -3.94976800 | 0.25198200  | -4.04863800 |
| H | -2.15543100 | 5.28753300  | -1.38127900 |
| H | -2.91649100 | 7.46001100  | -0.46298800 |
| H | -2.14863500 | 8.19925700  | 1.78383300  |
| H | -0.61940700 | 6.74454900  | 3.09843600  |
| H | 0.12239000  | 4.56448200  | 2.17430800  |
| H | 2.38429600  | -3.78055000 | 1.10087600  |
| H | 3.14256100  | -6.08803600 | 1.66809500  |
| H | 3.06831200  | -7.87614500 | -0.05917900 |
| H | 2.25078500  | -7.34633500 | -2.34540600 |
| H | 1.50880800  | -5.04027500 | -2.89555900 |
| H | 5.73265400  | 1.01097000  | 0.39767800  |
| H | 8.07067400  | 1.83542000  | 0.20359900  |
| H | 8.75195100  | 3.18871700  | -1.76729300 |
| H | 7.08627300  | 3.70581200  | -3.53905000 |
| H | 4.75722300  | 2.86279000  | -3.33559500 |
| H | 0.46929300  | -2.34656100 | 3.31105700  |
| H | 0.25660200  | -0.56532300 | 3.43580200  |
| H | -5.99553800 | -1.57944900 | 3.76544100  |
| H | -7.77925200 | -0.98024300 | 2.12183300  |
| H | -7.18097400 | 0.35808000  | 0.11494900  |
| H | -3.01339300 | 0.29716700  | 1.30875700  |
| H | 4.01206700  | -1.12123600 | 1.07956300  |
| H | 6.16598500  | -1.00734800 | 2.30740200  |
| H | 6.18573000  | -0.97819100 | 4.80579500  |
| H | 4.02386200  | -1.07154200 | 6.03263000  |
| H | 1.88893900  | -1.18670600 | 4.81423500  |
| H | -5.30774000 | 2.33185000  | -0.41919900 |
| H | -5.39172200 | 0.92991800  | -1.46992000 |
| H | -2.67478200 | -2.06918900 | 1.45685700  |
| H | -1.64884400 | -3.17925200 | 2.41763600  |
| H | -0.25115100 | -2.11576900 | 0.88533500  |

IntVA (Energy: 25.1 kcal/mol)

| Atom | Coordinates (Angstroms) |             |             |
|------|-------------------------|-------------|-------------|
|      | X                       | Y           | Z           |
| C    | -1.96118000             | -2.77077100 | -1.73950900 |
| C    | -1.04595900             | -3.58708400 | -1.15529000 |
| C    | -0.00602700             | -2.74268000 | -0.64374000 |
| N    | -0.28524200             | -1.43164700 | -0.87414600 |
| C    | -1.52293200             | -1.42792600 | -1.49747400 |
| C    | -1.96964400             | 2.99832500  | -0.35145600 |
| N    | -2.72993800             | 2.04804700  | -0.94135800 |
| C    | -1.86630500             | 0.92835300  | -1.16084600 |
| C    | -0.56791600             | 1.22322100  | -0.71843300 |
| C    | -0.65035700             | 2.57380700  | -0.25889500 |
| C    | 3.68062600              | -3.00093300 | 0.17281900  |
| C    | 4.53736200              | -1.98454600 | -0.06775400 |
| C    | 3.72740900              | -0.83408500 | -0.41457300 |
| N    | 2.41636100              | -1.15942800 | -0.43186400 |
| C    | 2.35641700              | -2.49155900 | -0.09851500 |
| C    | 2.90613800              | 3.73337500  | -0.04390700 |
| C    | 3.94298600              | 2.93674400  | -0.37368600 |
| C    | 3.42440700              | 1.58564000  | -0.44846200 |
| N    | 2.07568800              | 1.58001700  | -0.26813000 |
| C    | 1.73140000              | 2.89450100  | -0.00132400 |
| C    | -2.30668200             | -0.29404100 | -1.68896100 |
| C    | 0.45479200              | 3.39408400  | 0.11450100  |
| C    | 1.21013700              | -3.25673700 | -0.14107600 |
| C    | 4.24613700              | 0.45753900  | -0.56548500 |
| C    | -3.57218900             | -0.40093800 | -2.44962700 |
| C    | 0.24858600              | 4.79361800  | 0.53515000  |
| C    | 1.24747800              | -4.68991300 | 0.23735300  |
| C    | -3.72556200             | 0.35056100  | -3.62169700 |
| C    | -4.90227100             | 0.29093800  | -4.35821200 |
| C    | -5.95103100             | -0.52146500 | -3.93316500 |
| C    | -5.80844500             | -1.27664500 | -2.77350200 |
| C    | -4.62995500             | -1.21723900 | -2.03762200 |
| C    | 0.78143400              | 5.24894400  | 1.74915700  |
| C    | 0.59738300              | 6.56169300  | 2.16602700  |
| C    | -0.13103500             | 7.45200400  | 1.38259500  |
| C    | -0.66516300             | 7.01734200  | 0.17319700  |
| C    | -0.47620100             | 5.70576300  | -0.24564600 |
| C    | 0.46344700              | -5.14539700 | 1.30403600  |
| C    | 0.47535000              | -6.48460800 | 1.67444700  |
| C    | 1.26457200              | -7.39753000 | 0.98026400  |
| C    | 2.03892400              | -6.96031900 | -0.08945200 |
| C    | 2.02732200              | -5.61925100 | -0.45885600 |
| C    | 5.71193600              | 0.60445500  | -0.71560000 |
| C    | 6.36719700              | -0.00685500 | -1.79338200 |
| C    | 7.74461500              | 0.09020500  | -1.94977200 |
| C    | 8.50478100              | 0.80614000  | -1.02998800 |
| C    | 7.87248500              | 1.41370900  | 0.05099900  |
| C    | 6.49541800              | 1.30841300  | 0.20909200  |
| Ni   | 0.87271400              | 0.05349400  | -0.45497600 |
| C    | -4.38745000             | -0.33436000 | 2.14187700  |
| C    | -3.60880100             | -1.01152100 | 3.24780500  |
| O    | -4.22256300             | -1.56757500 | 4.13788200  |
| O    | -2.28271100             | -1.06540000 | 3.26018300  |
| C    | -1.35756900             | -0.42967800 | 2.34167300  |
| C    | 0.08172700              | -0.92792000 | 2.49907200  |

|   |             |             |             |
|---|-------------|-------------|-------------|
| C | 0.50533700  | -0.92484700 | 3.97059200  |
| O | 0.86806800  | -0.13040400 | 1.75465000  |
| C | -5.72336600 | -0.74185400 | 2.03446100  |
| C | -6.55069400 | -0.22306900 | 1.04919300  |
| C | -6.04886200 | 0.69543800  | 0.13408900  |
| C | -4.72847900 | 1.12391300  | 0.22806500  |
| C | -3.91892900 | 0.63473800  | 1.25082900  |
| C | -4.17865900 | 2.07231300  | -0.81113900 |
| H | -2.87205500 | -3.05310700 | -2.25394000 |
| H | -1.04275100 | -4.67047300 | -1.11416500 |
| H | -2.42520400 | 3.92700300  | -0.01830700 |
| H | 3.90842400  | -4.00935500 | 0.49888900  |
| H | 5.61780100  | -1.98042300 | 0.02407300  |
| H | 2.90441400  | 4.80916700  | 0.09184900  |
| H | 4.97417400  | 3.21924300  | -0.55040100 |
| H | -2.90190000 | 0.98818500  | -3.94272700 |
| H | -5.00087400 | 0.88014900  | -5.26917800 |
| H | -6.87636500 | -0.56595200 | -4.50630300 |
| H | -6.62777000 | -1.90415300 | -2.42372000 |
| H | -4.52946700 | -1.78451100 | -1.11238000 |
| H | 1.33345000  | 4.54398100  | 2.36941700  |
| H | 1.01733400  | 6.88883100  | 3.11661500  |
| H | -0.28028200 | 8.47965800  | 1.71169200  |
| H | -1.22455200 | 7.70861100  | -0.45684100 |
| H | -0.86879300 | 5.37884200  | -1.20809000 |
| H | -0.14660500 | -4.42358000 | 1.84778800  |
| H | -0.13305600 | -6.81521900 | 2.51542800  |
| H | 1.27354400  | -8.44751600 | 1.27099500  |
| H | 2.65156700  | -7.66829600 | -0.64705700 |
| H | 2.62086600  | -5.27818700 | -1.30690500 |
| H | 5.76963500  | -0.56136600 | -2.51690100 |
| H | 8.22712000  | -0.39231900 | -2.79955800 |
| H | 9.58447700  | 0.88641800  | -1.15157200 |
| H | 8.45825400  | 1.96312800  | 0.78764200  |
| H | 6.00672200  | 1.76101200  | 1.07136500  |
| H | -1.67277200 | -0.60503600 | 1.30566200  |
| H | -1.34168700 | 0.65171200  | 2.55094100  |
| H | 0.07508700  | -2.01219000 | 2.17009500  |
| H | -0.11376400 | -1.58003200 | 4.60024600  |
| H | 0.44547300  | 0.10309600  | 4.36013200  |
| H | -6.08649300 | -1.47748400 | 2.74759500  |
| H | -7.58465600 | -0.55815300 | 0.97531800  |
| H | -6.67471000 | 1.05797300  | -0.68397500 |
| H | -2.90552700 | 1.01092400  | 1.31711300  |
| H | -4.43966400 | 3.11185000  | -0.56121300 |
| H | -4.65400200 | 1.85967500  | -1.77856300 |
| H | 1.55332700  | -1.24385300 | 4.03357900  |

1. P. J. Chmielewski, L. Latos-Grażyński, K. Rachlewicz, T. Glowiak, *Angewandte Chemie International Edition in English*, 1994, **33**, 779.

## [8] Crystal structure report of 2-NH<sub>2</sub>-*m*-C<sub>6</sub>H<sub>4</sub>-CO<sub>2</sub>CH<sub>3</sub>NCTPP (i14918; CCDC1889366)

### General Information

The crystals of 2-NH<sub>2</sub>-*m*-C<sub>6</sub>H<sub>4</sub>-CO<sub>2</sub>CH<sub>3</sub>NCTPP suitable for X-ray diffraction structural analysis were obtained from diffusion of hexane into a solution of the compound in CH<sub>2</sub>Cl<sub>2</sub>. Diffraction measurements were carried out at 173.0 (2) K on a Bruker SMART Apex CCD diffractometer equipped with graphite-monochromated Mo K $\alpha$  radiation ( $\lambda = 0.71073 \text{ \AA}$ ). The structures were solved by direct methods and refined using full-matrix least-squares methods against  $F^2$  values using the SHELXTL program packages (Version 6.14). The positions of the hydrogen atoms were geometrically generated with a fixed distance and were assigned isotropic thermal parameters by the SHELXTL idealization methods. Refinement was carried out using anisotropic thermal parameters for all the non-hydrogen atoms. The absorption correction program SADABS was used for these three structures. Summary and experimental details for X-ray data collections are provided in Table S1.

Table S1. Crystal data and structure refinement for i14918.

|                                   |                                                                               |                  |
|-----------------------------------|-------------------------------------------------------------------------------|------------------|
| Identification code               | i14918                                                                        |                  |
| Empirical formula                 | C <sub>54</sub> H <sub>40</sub> Cl <sub>2</sub> N <sub>4</sub> O <sub>2</sub> |                  |
| Formula weight                    | 847.80                                                                        |                  |
| Temperature                       | 173.0 (2) K                                                                   |                  |
| Wavelength                        | 0.71073 Å                                                                     |                  |
| Crystal system                    | Triclinic                                                                     |                  |
| Space group                       | P-1                                                                           |                  |
| Unit cell dimensions              | a = 10.2504(6) Å                                                              | α = 106.468(3)°. |
|                                   | b = 13.7475(7) Å                                                              | β = 95.196(3)°.  |
|                                   | c = 16.1283(10) Å                                                             | γ = 105.201(3)°. |
| Volume                            | 2069.6(2) Å <sup>3</sup>                                                      |                  |
| Z                                 | 2                                                                             |                  |
| Density (calculated)              | 1.360 Mg/m <sup>3</sup>                                                       |                  |
| Absorption coefficient            | 0.207 mm <sup>-1</sup>                                                        |                  |
| F(000)                            | 884                                                                           |                  |
| Crystal size                      | 0.120 x 0.100 x 0.060 mm <sup>3</sup>                                         |                  |
| Theta range for data collection   | 1.740 to 26.373°.                                                             |                  |
| Index ranges                      | -12 ≤ h ≤ 12, -17 ≤ k ≤ 17, -20 ≤ l ≤ 20                                      |                  |
| Reflections collected             | 44185                                                                         |                  |
| Independent reflections           | 8453 [R(int) = 0.0678]                                                        |                  |
| Completeness to theta = 25.000°   | 99.9 %                                                                        |                  |
| Absorption correction             | Semi-empirical from equivalents                                               |                  |
| Max. and min. transmission        | 0.9588 and 0.8323                                                             |                  |
| Refinement method                 | Full-matrix least-squares on F <sup>2</sup>                                   |                  |
| Data / restraints / parameters    | 8453 / 168 / 560                                                              |                  |
| Goodness-of-fit on F <sup>2</sup> | 1.047                                                                         |                  |
| Final R indices [I > 2σ(I)]       | R1 = 0.0645, wR2 = 0.1678                                                     |                  |
| R indices (all data)              | R1 = 0.0942, wR2 = 0.1866                                                     |                  |
| Extinction coefficient            | n/a                                                                           |                  |
| Largest diff. peak and hole       | 0.813 and -0.832 e.Å <sup>-3</sup>                                            |                  |

Figure S1. Molecular structure of 2-NH<sub>2</sub>-*m*-C<sub>6</sub>H<sub>4</sub>-CO<sub>2</sub>CH<sub>3</sub>NCTPP from X-ray single structure determination with atoms presented in 30% thermal ellipsoids

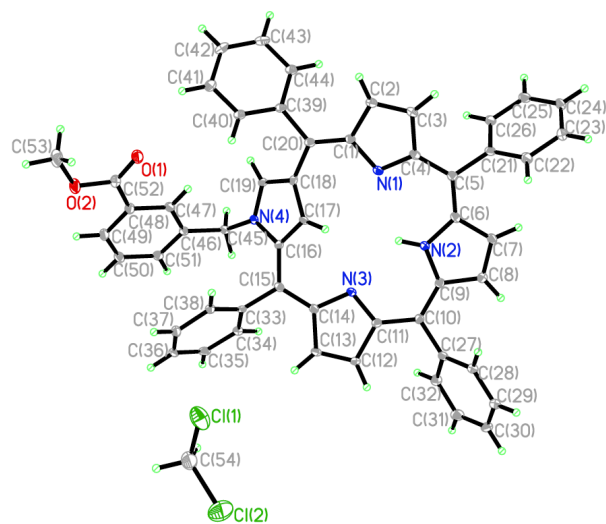

Supplement: c9dt00104b1.pdf [file c9dt00104b1.pdf]
